# Supplementary material for: Photo-responsive lignin fragment-based polymers as switchable adhesives
Source: Royal Society of Chemistry journal article supplement (doi:10.1039/d2py01474b), 2023-01-01
Supplement: d2py01474b1.pdf [file d2py01474b1.pdf]

## Supplementary Information

### Photo-responsive lignin fragment-based polymers as switchable adhesives

Pallabi Sinha Roy,<sup>a,b</sup> Matthieu M. Mention,<sup>c</sup> Antonio F. Patti,<sup>a,b</sup> Gil Garnier,<sup>\*b,c</sup> Florent Allais<sup>\*†b,c</sup> and Kei Saito<sup>\*†d</sup>

<sup>a</sup>. School of Chemistry, Monash University, Clayton VIC 3800, Australia. <sup>b</sup>. Department of Chemical Engineering, Bioresources Processing Research Institute of Australia (BioPRIA), Monash University, Clayton VIC 3800, Australia. <sup>c</sup>. URD Agro-Biotechnologies Industrielles (ABI), CEBB, AgroParisTech, 51110, Pomacle, France. <sup>d</sup>. Graduate School of Advanced Integrated Studies in Human Survivability, Kyoto University, Higashi-Ichijo-Kan, Yoshida-nakaadachicho 1, Sakyo-ku, Kyoto, 606-8306, Japan, † K. Saito and F. Allais contributed equally to this work.

#### Table of Contents

|                                                                                                                                                                            |           |
|----------------------------------------------------------------------------------------------------------------------------------------------------------------------------|-----------|
| <b>1. <sup>1</sup>H and <sup>13</sup>C NMR spectra of the synthesized monomers .....</b>                                                                                   | <b>3</b>  |
| Figure S1. <sup>1</sup> H NMR spectrum of M-PA-1 in DMSO-d <sub>6</sub> .....                                                                                              | 4         |
| Figure S2. <sup>13</sup> C NMR spectrum of M-PA-1 in DMSO-d <sub>6</sub> .....                                                                                             | 6         |
| Figure S3. <sup>1</sup> H NMR spectrum of M-PA-2 in DMSO-d <sub>6</sub> .....                                                                                              | 7         |
| Figure S4. <sup>13</sup> C NMR spectrum of M-PA-2 in DMSO-d <sub>6</sub> .....                                                                                             | 8         |
| Figure S5. <sup>1</sup> H NMR spectrum of M-PA-3 in DMSO-d <sub>6</sub> .....                                                                                              | 9         |
| Figure S6. <sup>1</sup> H NMR spectrum of M-PA-4 in DMSO-d <sub>6</sub> .....                                                                                              | 11        |
| Figure S7. <sup>1</sup> H NMR spectrum of M-PA-5 in DMSO-d <sub>6</sub> .....                                                                                              | 12        |
| Figure S8. <sup>1</sup> H NMR spectrum of M-PA-6 in DMSO-d <sub>6</sub> .....                                                                                              | 13        |
| <b>2. Comparison of FTIR spectra for compound PA-1 before crosslinking and at crosslinked and decrosslinked state .....</b>                                                | <b>14</b> |
| Figure S9. FTIR spectra for PA-1 at monomer, crosslinked and decrosslinked state .....                                                                                     | 14        |
| <b>3. UV-Vis spectra for crosslinking and decrosslinking of compounds PA-1 to PA-6 .....</b>                                                                               | <b>14</b> |
| Figure S10. UV-Vis spectra for PA-1. (a) Crosslinking at 365 nm (96%). (b) Decrosslinking at 254 nm (35%). .....                                                           | 14        |
| Figure S11. UV-Vis spectra for PA-2. (a) Crosslinking at 365 nm (97%). (b) Decrosslinking at 254 nm (35%). .....                                                           | 15        |
| Figure S12. UV-Vis spectra for PA-3. (a) Crosslinking at 365 nm (89%). (b) Decrosslinking at 254 nm (24%). .....                                                           | 15        |
| Figure S13. UV-Vis spectra for PA-4. (a) Crosslinking at 365 nm (87%). (b) Decrosslinking at 254 nm (22%). .....                                                           | 15        |
| Figure S14. UV-Vis spectra for PA-5. (a) Crosslinking at 365 nm (89%). (b) Decrosslinking at 254 nm (39%). .....                                                           | 16        |
| Figure S15. UV-Vis spectra for PA-6. (a) Crosslinking at 365 nm (90%). (b) Decrosslinking at 254 nm (36%). .....                                                           | 16        |
| Figure S16. Crosslinking % calculated using UV-Vis spectra for PA-1 to PA-6 with respect to 365 nm irradiation time. ...                                                   | 16        |
| Figure S17. Comparison of decrosslinking % calculated using UV-Vis spectra and the 254 nm irradiation time at which maximum decrosslinking observed for PA-1 to PA-6. .... | 17        |
| <b>4. Thermogravimetric analysis (TGA) data of polymer adhesive PA-1 to PA-6 .....</b>                                                                                     | <b>17</b> |
| Figure S18. Thermogravimetric analysis data for polymer adhesive PA-1. ....                                                                                                | 17        |
| Figure S19. Thermogravimetric analysis data for polymer adhesive PA-2. ....                                                                                                | 18        |
| Figure S20. Thermogravimetric analysis data for polymer adhesive PA-3. ....                                                                                                | 18        |
| Figure S21. Thermogravimetric analysis data for polymer adhesive PA-4. ....                                                                                                | 19        |
| Figure S22. Thermogravimetric analysis data for polymer adhesive PA-5. ....                                                                                                | 19        |
| Figure S23. Thermogravimetric analysis data for polymer adhesive PA-6. ....                                                                                                | 20        |
| <b>5. Glass transition temperature of polymer adhesive PA-1 to PA-6 .....</b>                                                                                              | <b>20</b> |
| Figure S24. Glass transition temperature for polymer adhesive PA-1 at crosslinked state. ....                                                                              | 20        |
| Figure S25. Glass transition temperature for polymer adhesive PA-1 at decrosslinked state. ....                                                                            | 21        |
| Figure S26. Glass transition temperature for polymer adhesive PA-2 at crosslinked state. ....                                                                              | 21        |
| Figure S27. Glass transition temperature for polymer adhesive PA-2 at decrosslinked state. ....                                                                            | 22        |
| Figure S28. Glass transition temperature for polymer adhesive PA-3 at crosslinked state. ....                                                                              | 22        |
| Figure S29. Glass transition temperature for polymer adhesive PA-3 at decrosslinked state. ....                                                                            | 23        |

|                                                                                                                                                     |           |
|-----------------------------------------------------------------------------------------------------------------------------------------------------|-----------|
| <b>Figure S30.</b> Glass transition temperature for polymer adhesive PA-4 at crosslinked state. ....                                                | 23        |
| <b>Figure S31.</b> Glass transition temperature for polymer adhesive PA-4 at decrosslinked state. ....                                              | 24        |
| <b>Figure S32.</b> Glass transition temperature for polymer adhesive PA-5 at crosslinked state. ....                                                | 24        |
| <b>Figure S33.</b> Glass transition temperature for polymer adhesive PA-5 at decrosslinked state. ....                                              | 25        |
| <b>Figure S34.</b> Glass transition temperature for polymer adhesive PA-6 at crosslinked state. ....                                                | 25        |
| <b>Figure S35.</b> Glass transition temperature for polymer adhesive PA-6 at decrosslinked state. ....                                              | 26        |
| <b>6. Additional adhesive lap shear strength testing results for polymer adhesive PA-1.....</b>                                                     | <b>26</b> |
| <b>Figure S36.</b> Reversibility test for the lap shear strength at 1.5 M concentration irradiated with 365 nm and 254 nm respectively.<br>.....    | 26        |
| <b>7. Design of experiment .....</b>                                                                                                                | <b>26</b> |
| <b>Figure S37.</b> D-optimal coefficients of the quadratic model for the Lap Shear Strength.....                                                    | 27        |
| <b>Figure S38.</b> Reversibility test for the lap shear strength value at 1 M concentration irradiated with 365 nm and 254 nm<br>respectively. .... | 28        |
| <b>8. Optical microscope images for failure mode analysis.....</b>                                                                                  | <b>29</b> |
| <b>Figure S39.</b> Failure analysis for all the polymer adhesive structures PA-1 to PA-6. ....                                                      | 29        |

**1.  $^1\text{H}$  and  $^{13}\text{C}$  NMR spectra of the synthesized monomers**

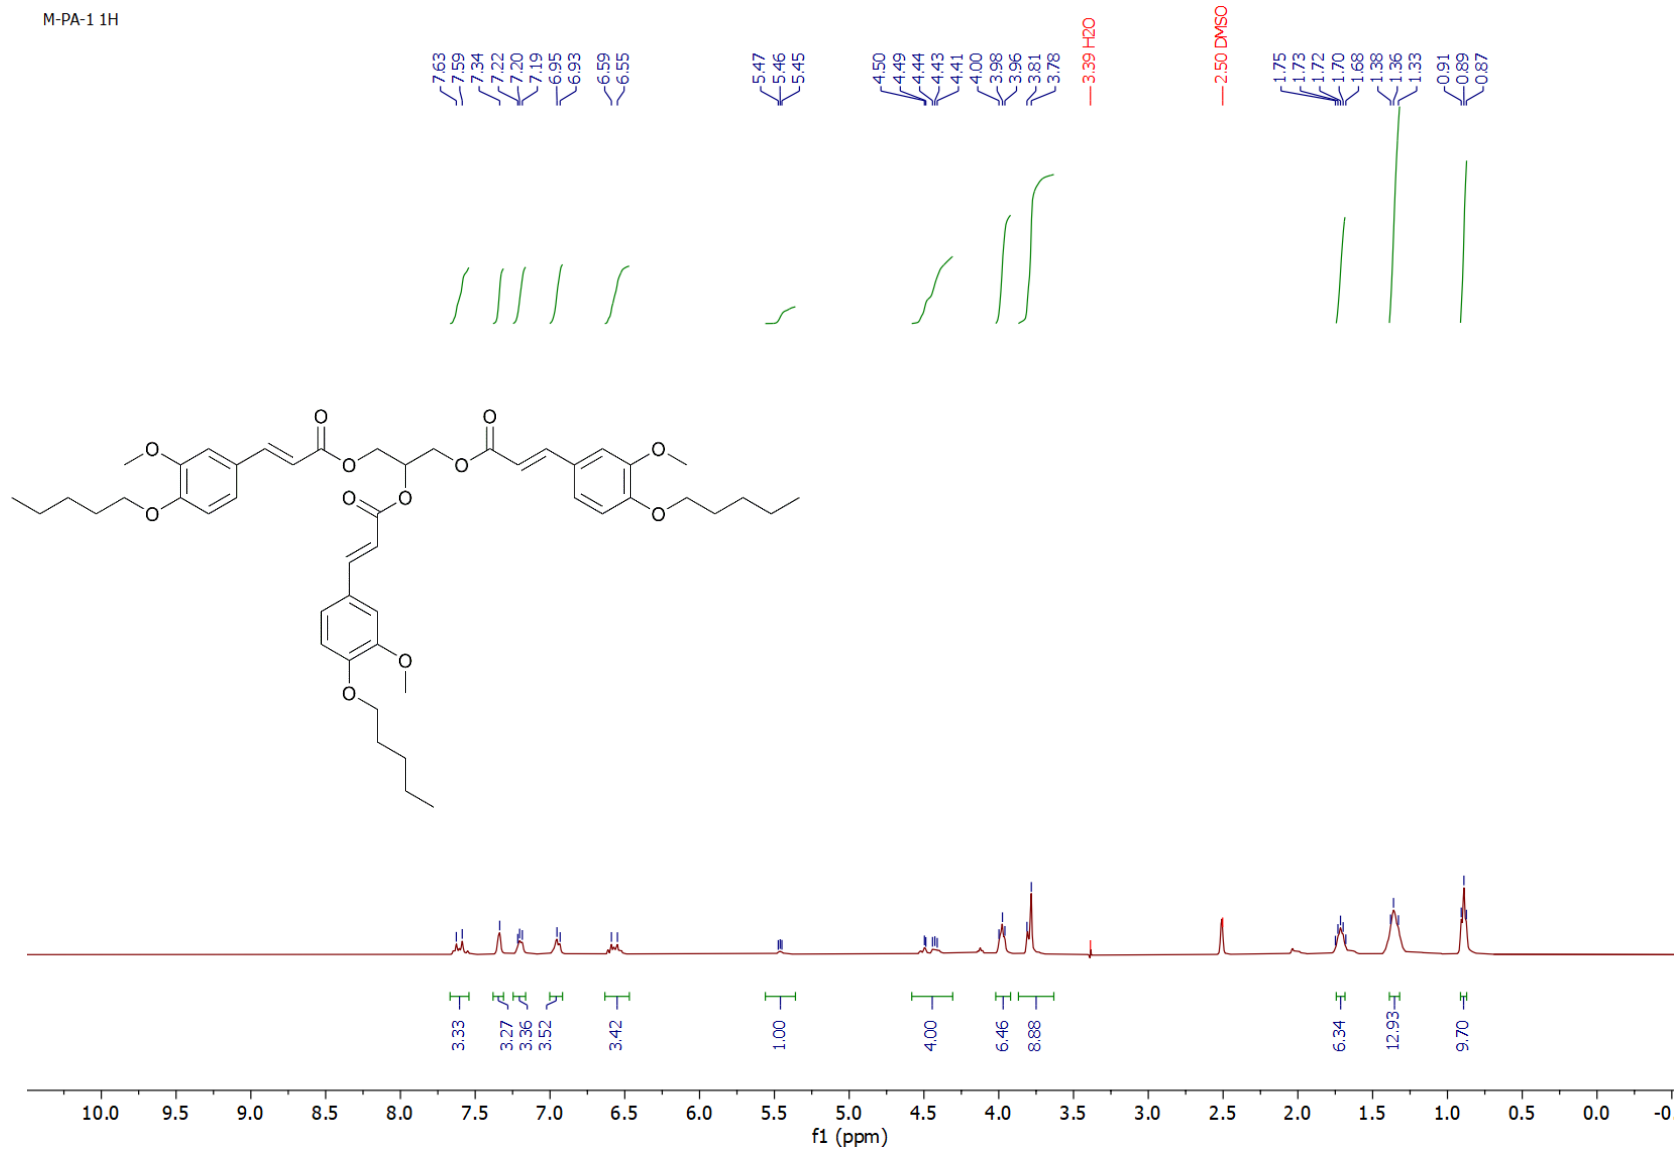

Figure S1. <sup>1</sup>H NMR spectrum of M-PA-1 in DMSO-d<sub>6</sub>.

M-PA-1-13C

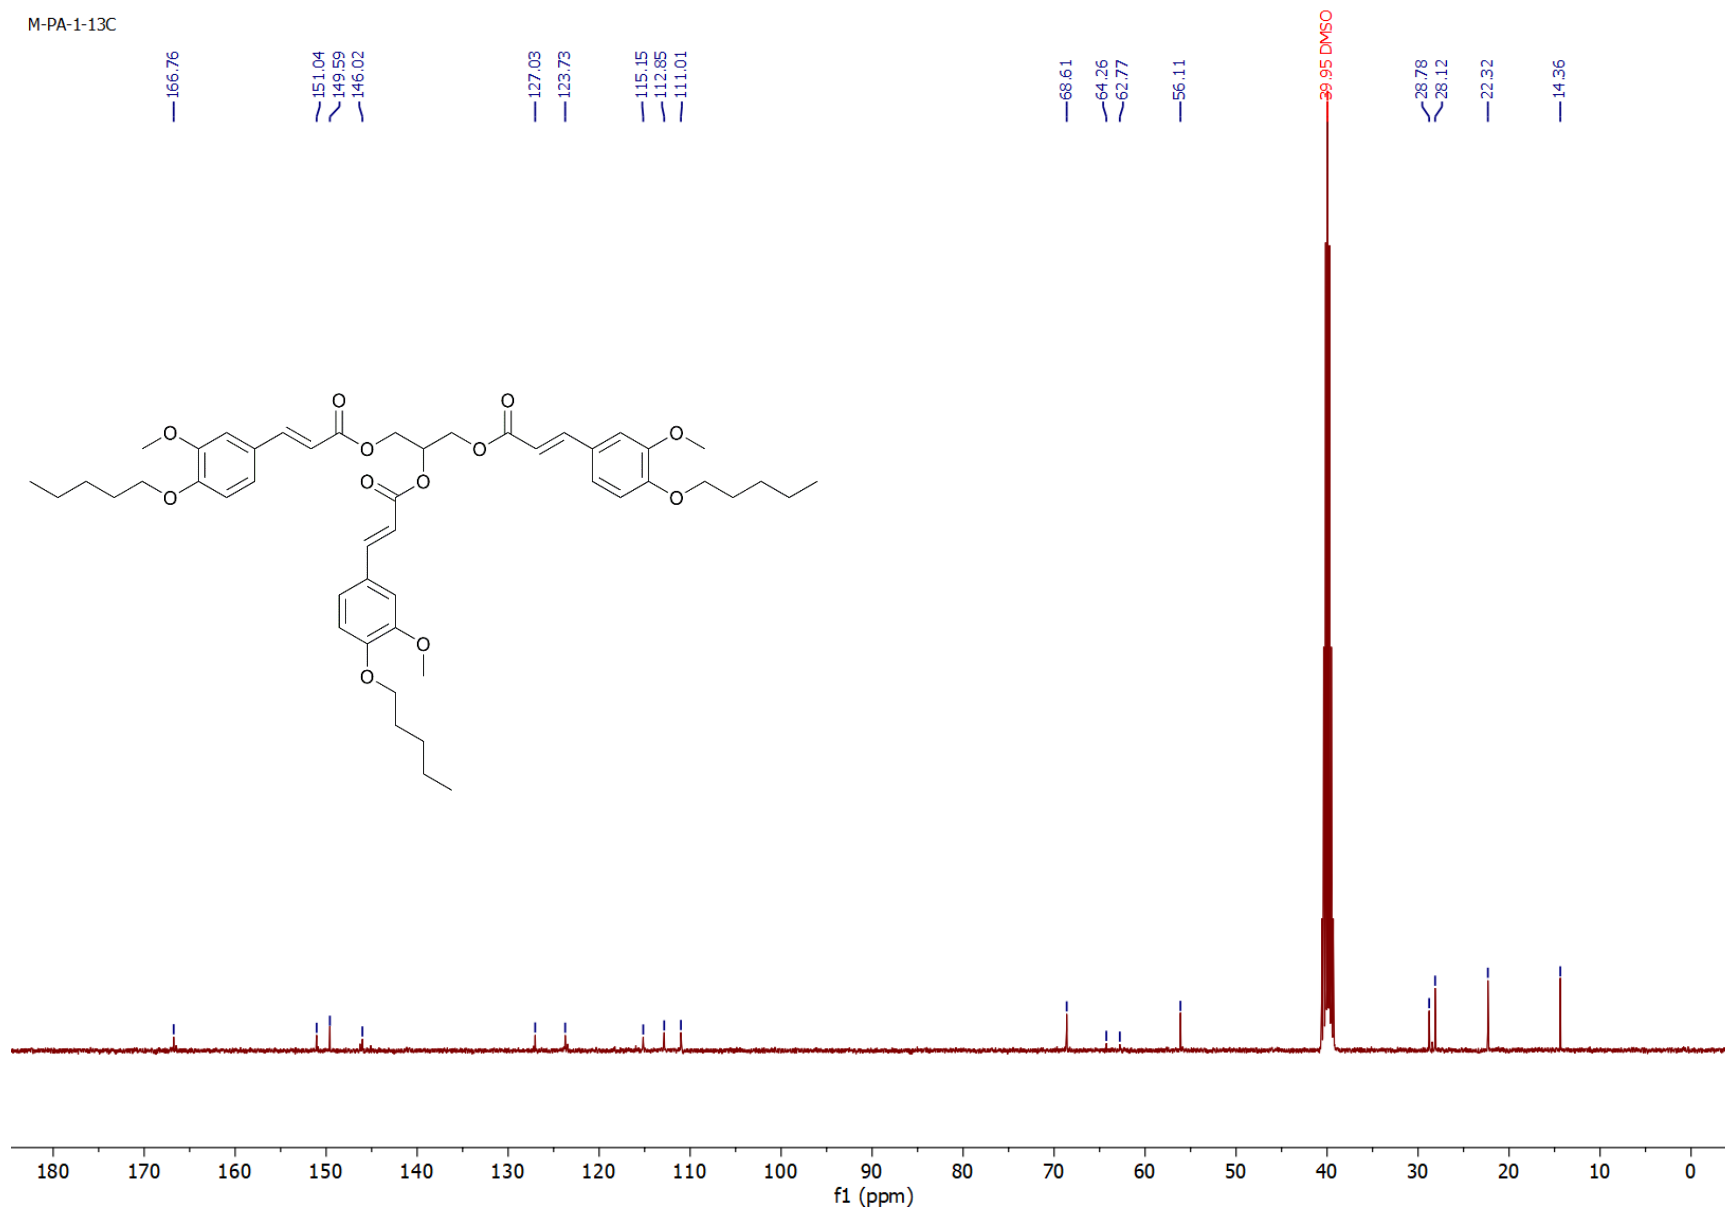

**Figure S2.**  $^{13}\text{C}$  NMR spectrum of M-PA-1 in  $\text{DMSO-d}_6$ .

M-PA-2 1H

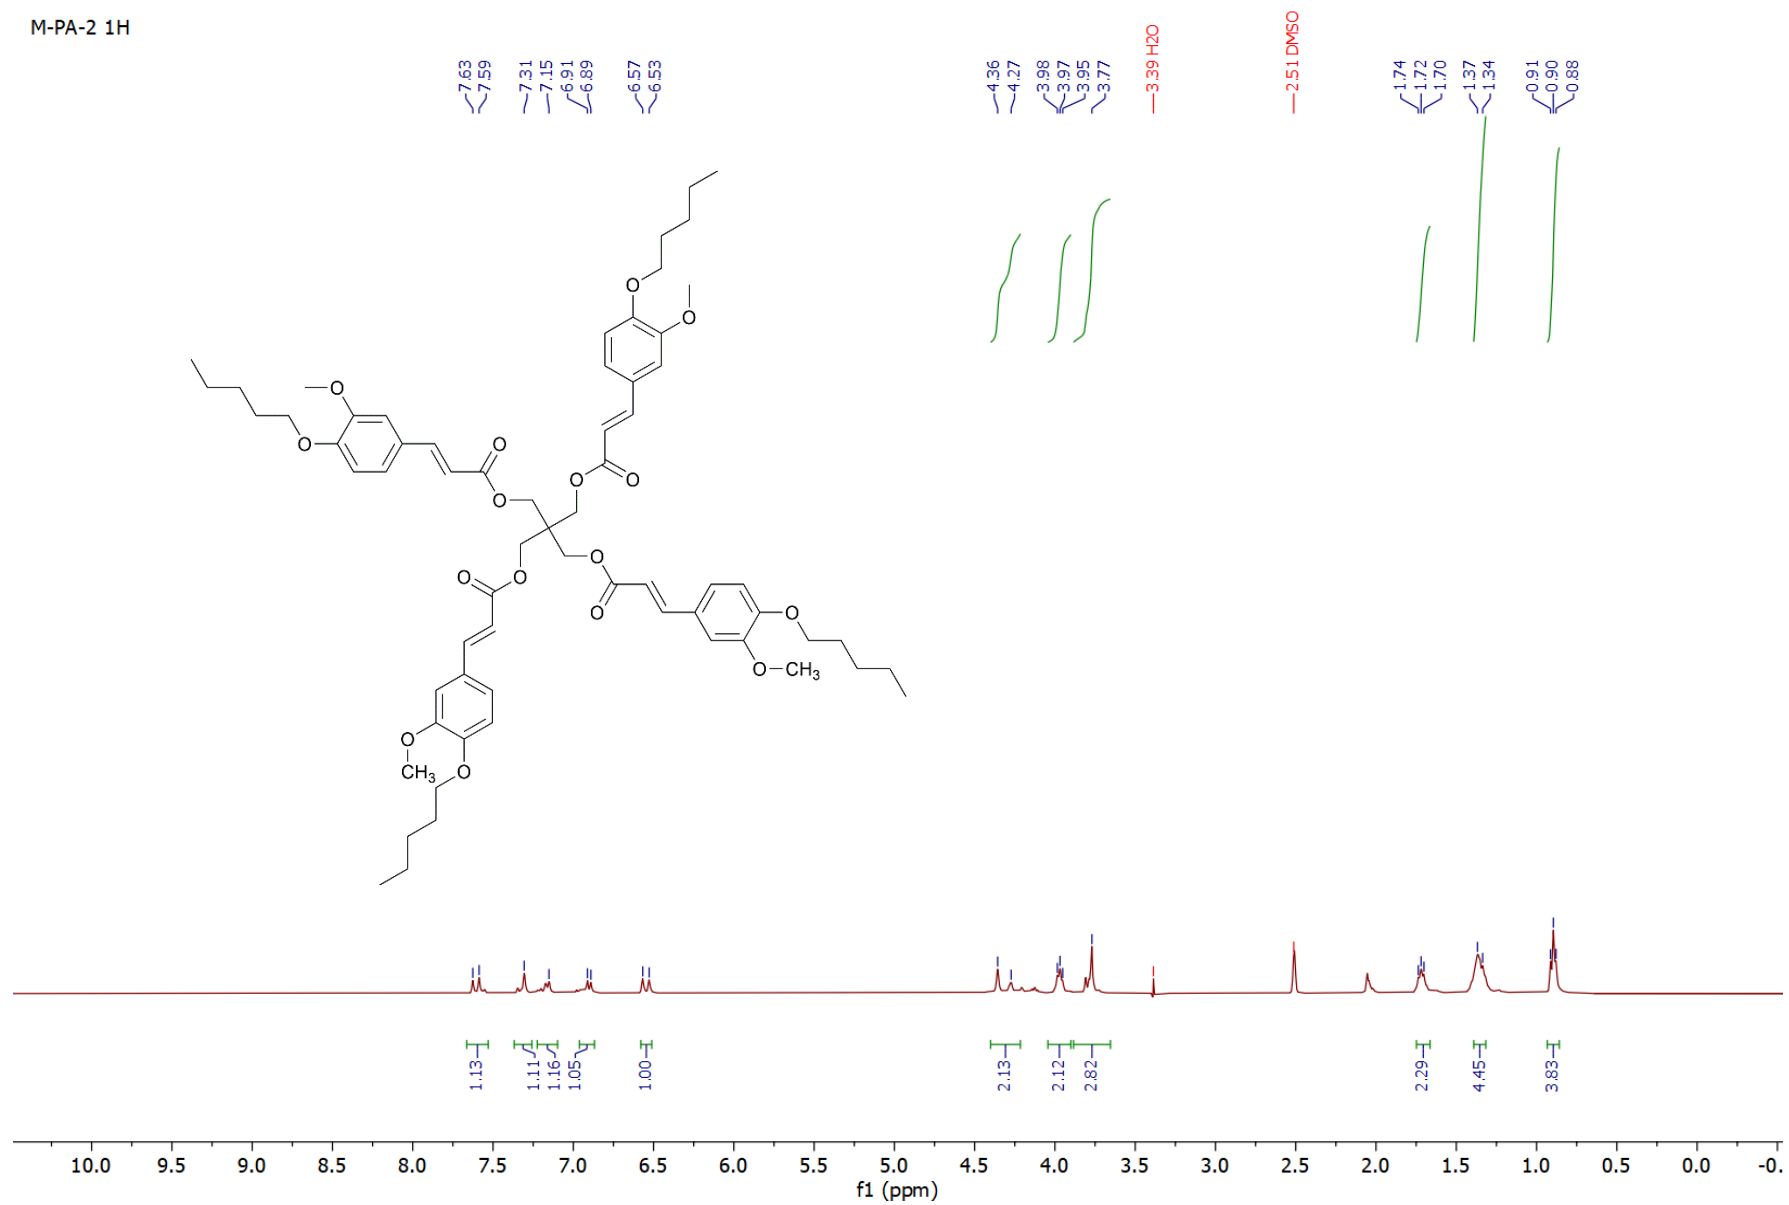

Figure S3. <sup>1</sup>H NMR spectrum of M-PA-2 in DMSO-d<sub>6</sub>.

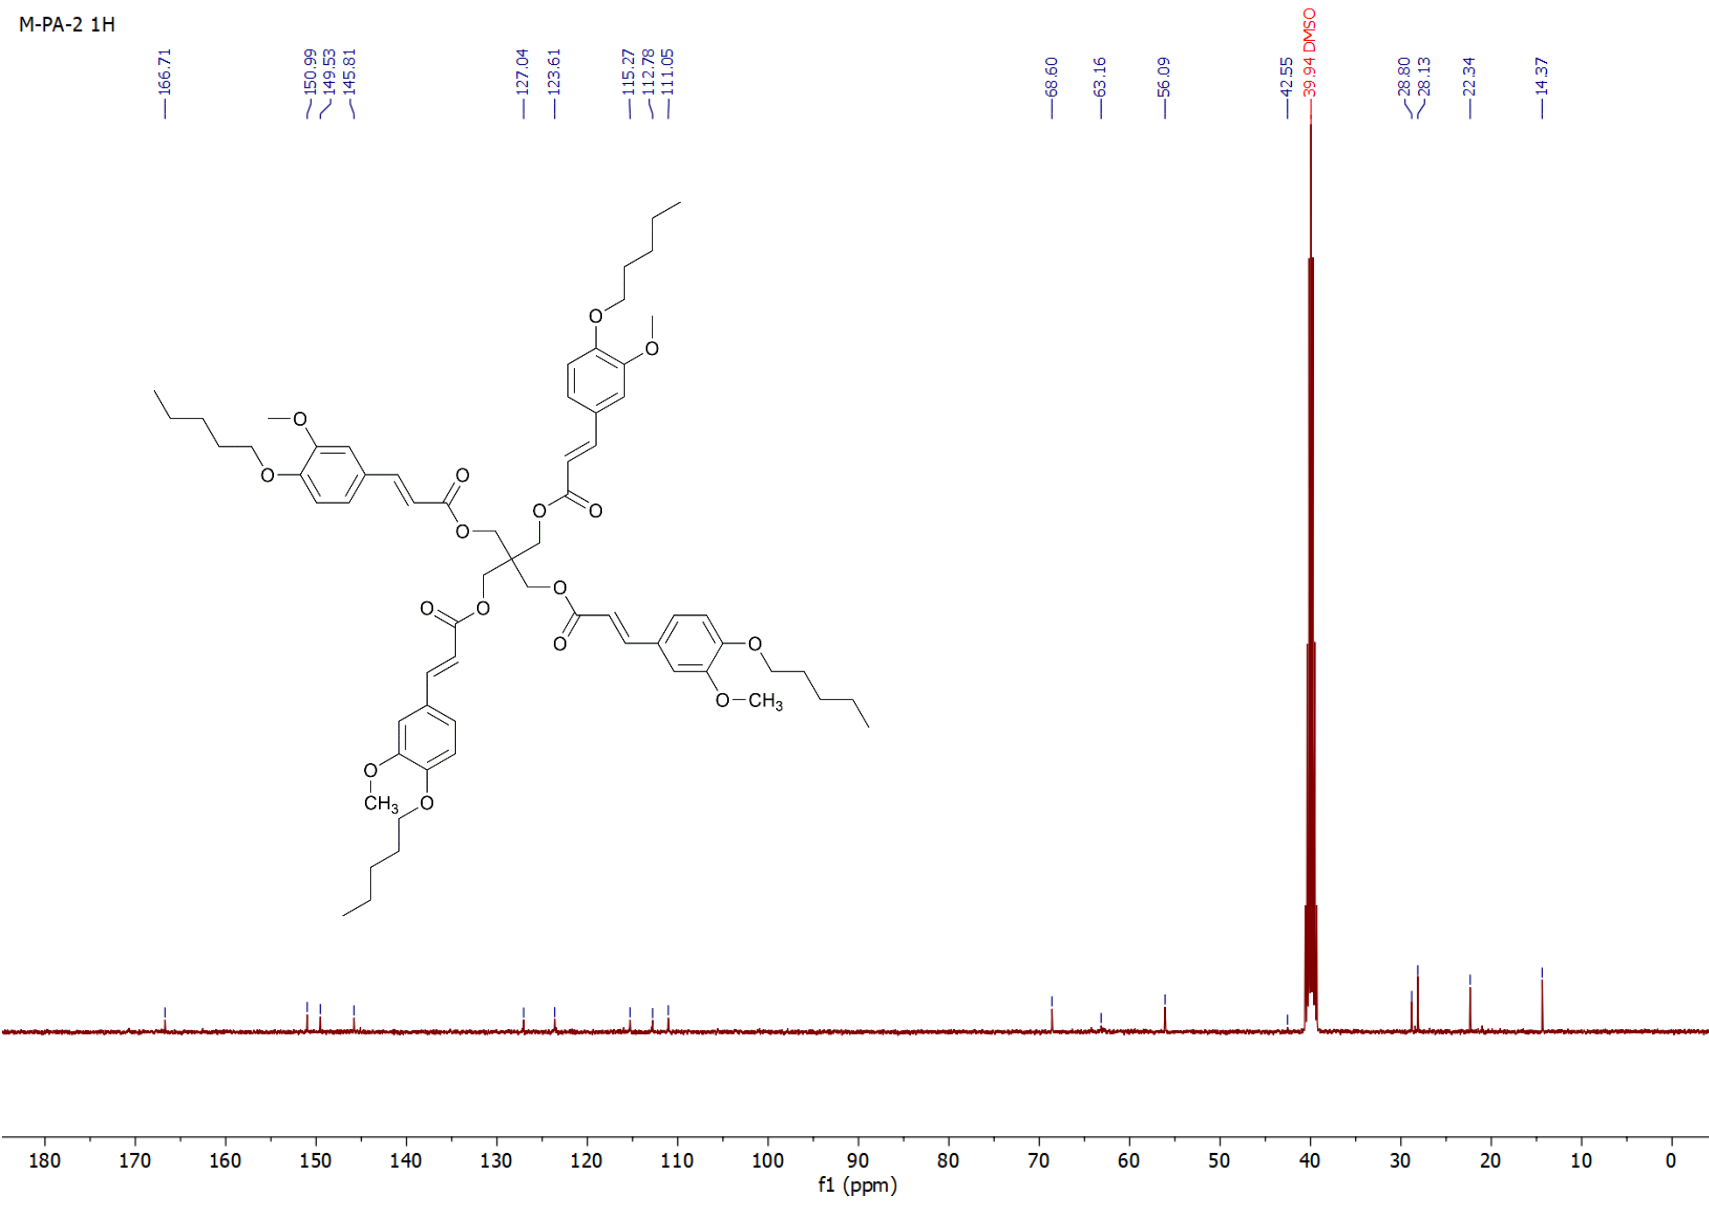

Figure S4. <sup>13</sup>C NMR spectrum of M-PA-2 in DMSO-d<sub>6</sub>.



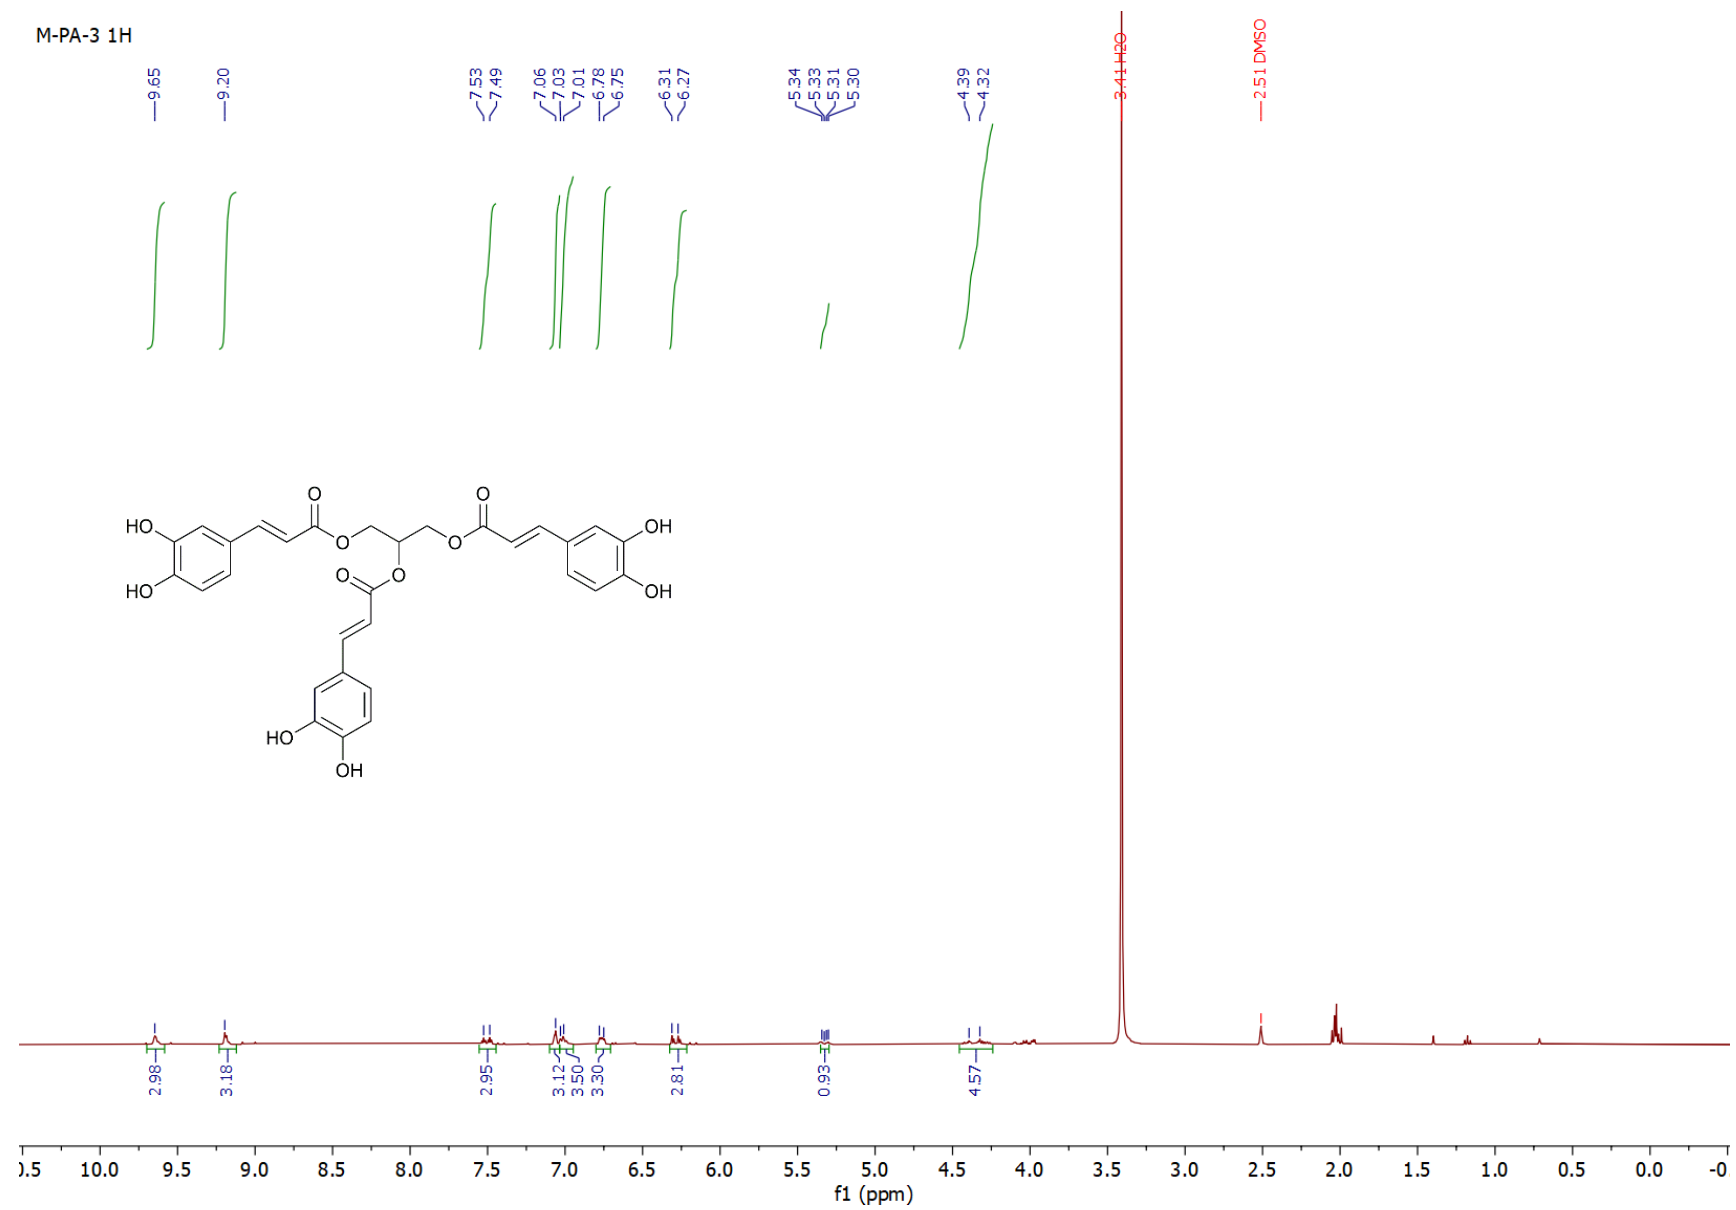

Figure S5. <sup>1</sup>H NMR spectrum of M-PA-3 in DMSO-d<sub>6</sub>.

M-PA-4 1H

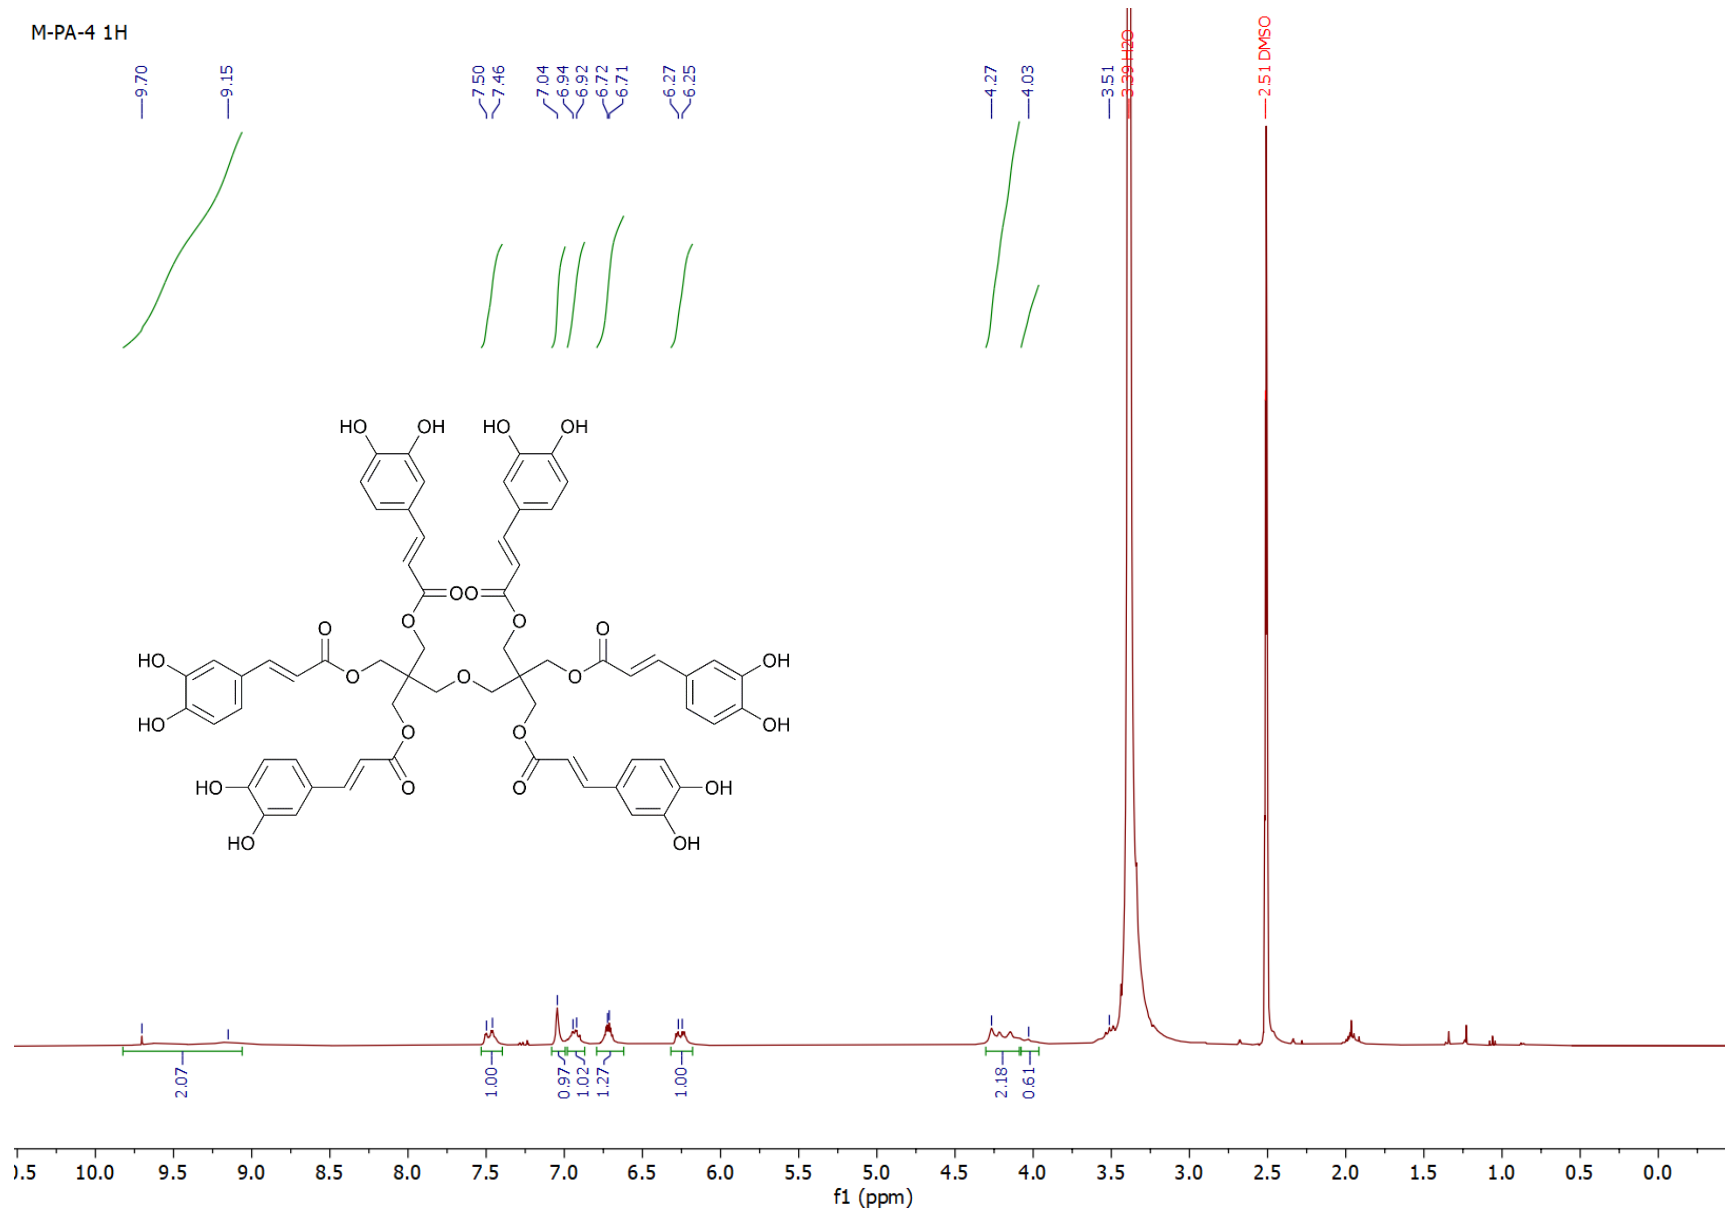

**Figure S6.**  $^1\text{H}$  NMR spectrum of M-PA-4 in  $\text{DMSO-d}_6$ .

M-PA-5 1H

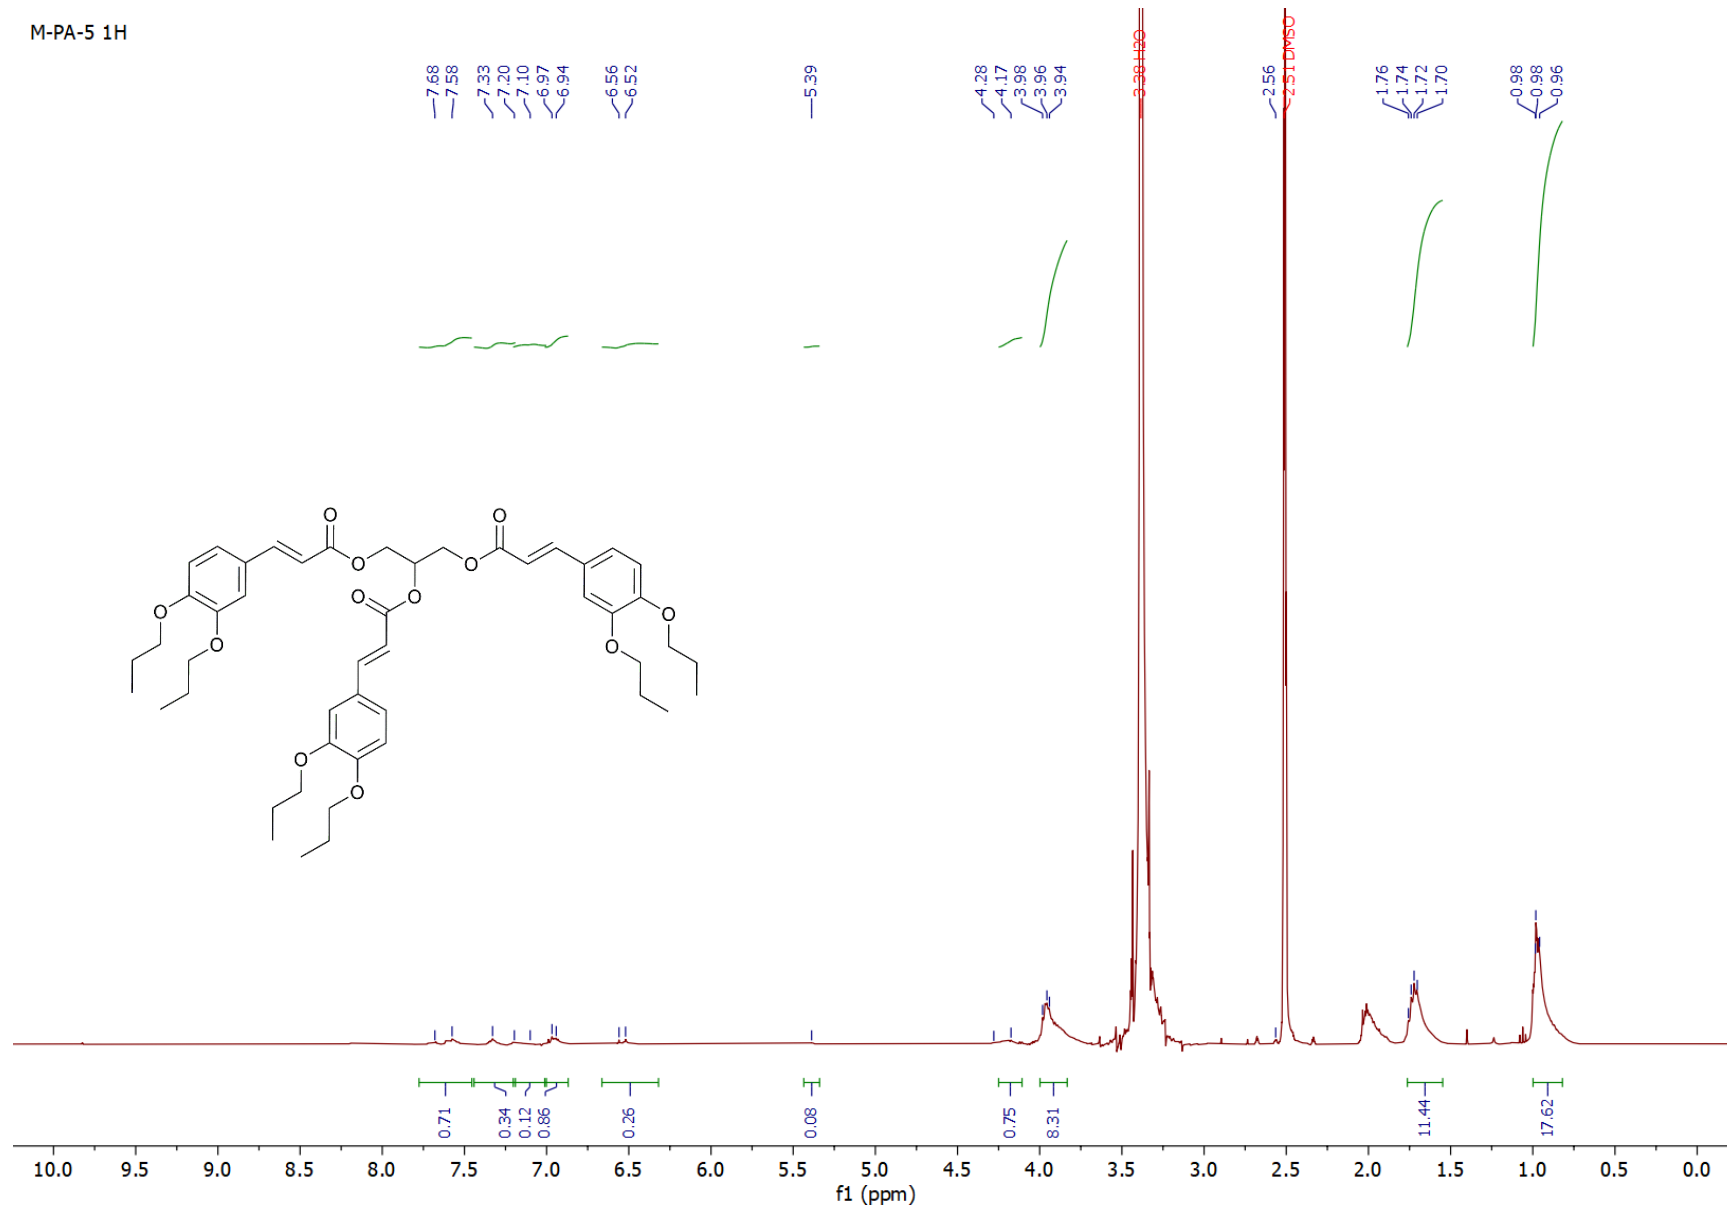

Figure S7. <sup>1</sup>H NMR spectrum of M-PA-5 in DMSO-d<sub>6</sub>.

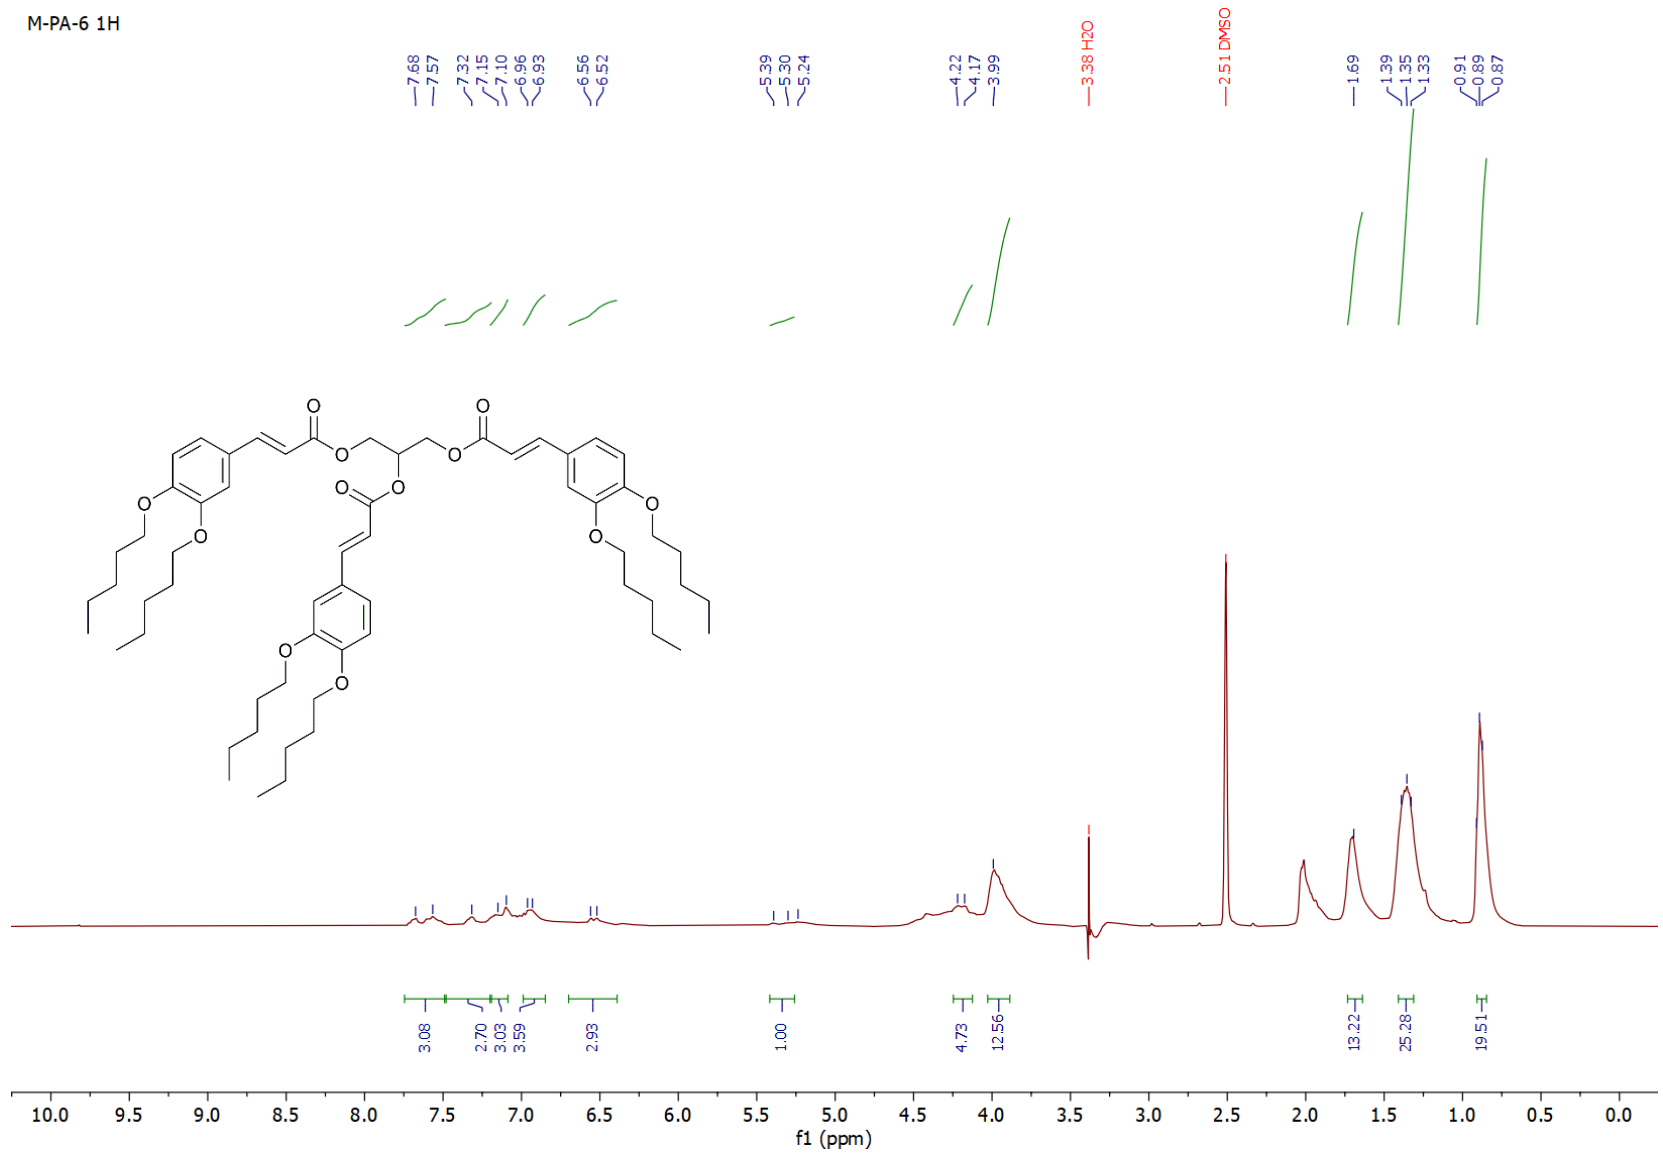

Figure S8. <sup>1</sup>H NMR spectrum of M-PA-6 in DMSO-d<sub>6</sub>.

## 2. Comparison of FTIR spectra for compound PA-1 before crosslinking and at crosslinked and decrosslinked state

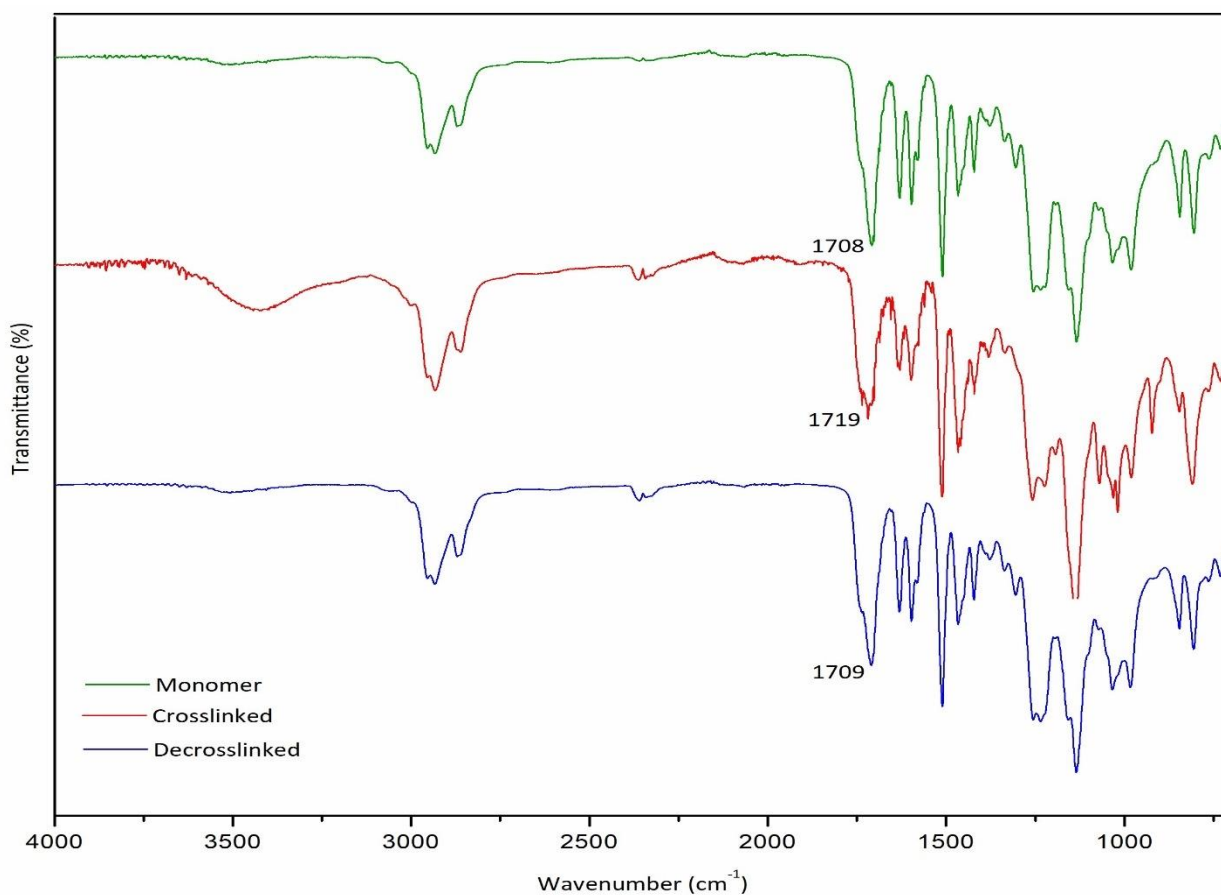

Figure S9. FTIR spectra for PA-1 at monomer, crosslinked and decrosslinked state.

## 3. UV-Vis spectra for crosslinking and decrosslinking of compounds PA-1 to PA-6

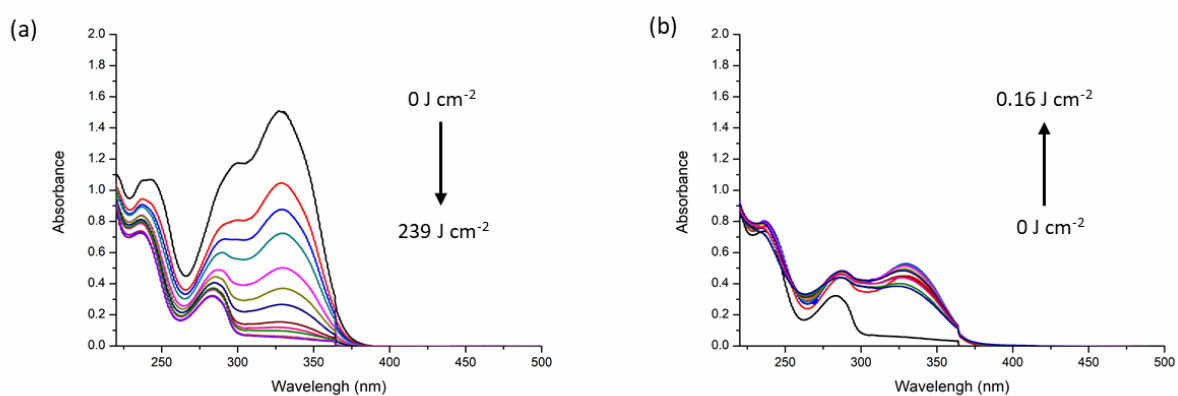

Figure S10. UV-Vis spectra for PA-1. (a) Crosslinking at 365 nm (96%). (b) Decrosslinking at 254 nm (35%).

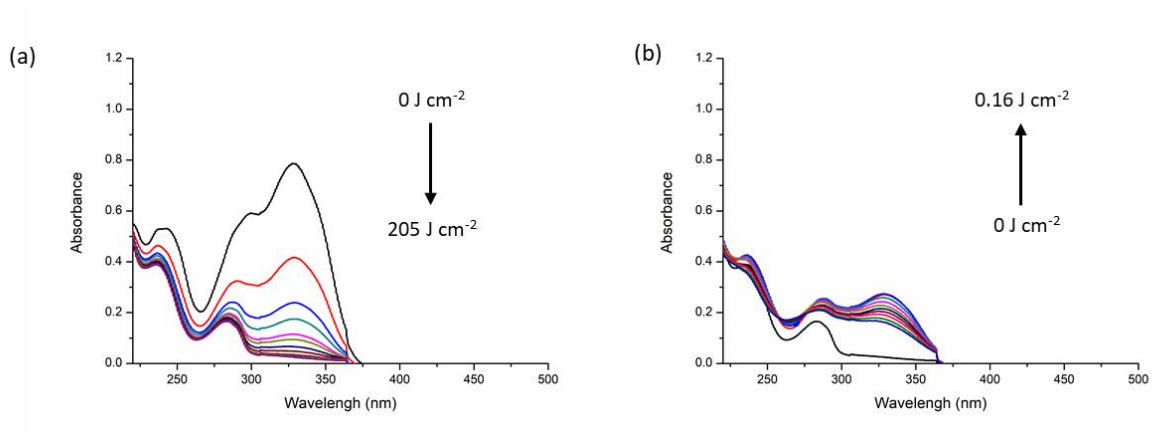

**Figure S11.** UV-Vis spectra for PA-2. (a) Crosslinking at 365 nm (97%). (b) Decrosslinking at 254 nm (35%).

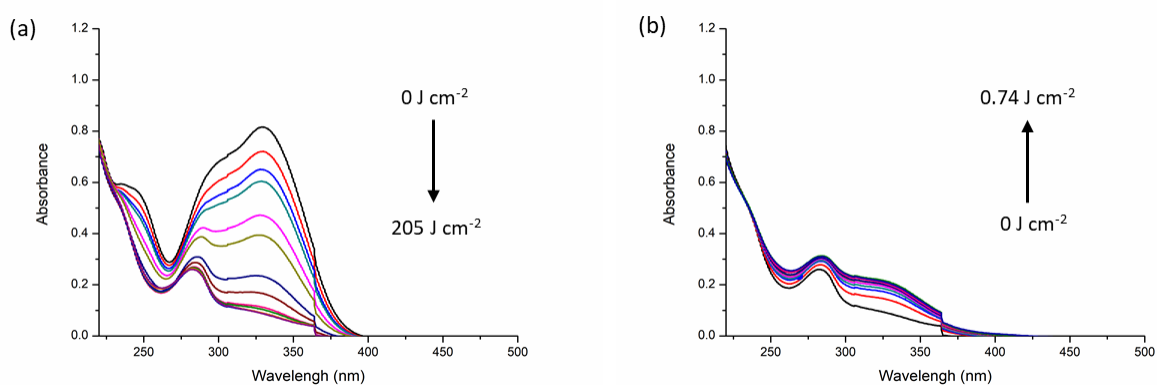

**Figure S12.** UV-Vis spectra for PA-3. (a) Crosslinking at 365 nm (89%). (b) Decrosslinking at 254 nm (24%).

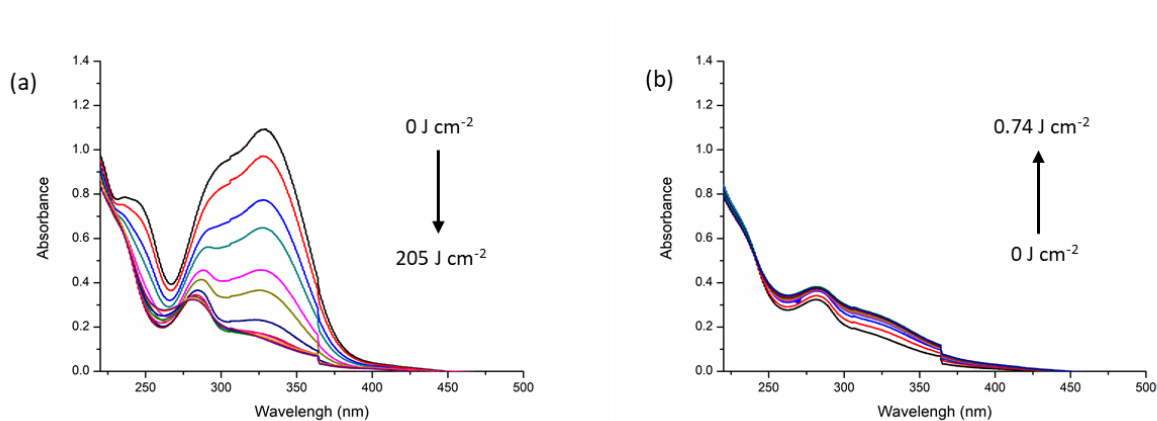

**Figure S13.** UV-Vis spectra for PA-4. (a) Crosslinking at 365 nm (87%). (b) Decrosslinking at 254 nm (22%).

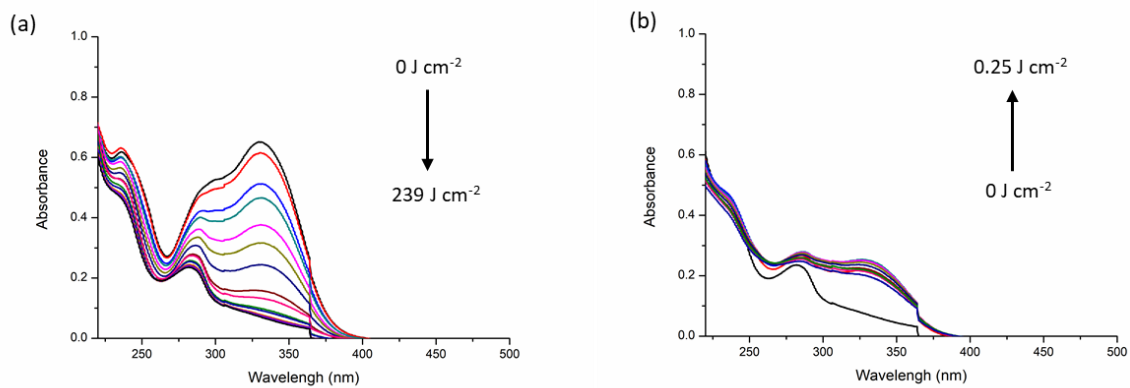

Figure S14. UV-Vis spectra for PA-5. (a) Crosslinking at 365 nm (89%). (b) Decrosslinking at 254 nm (39%).

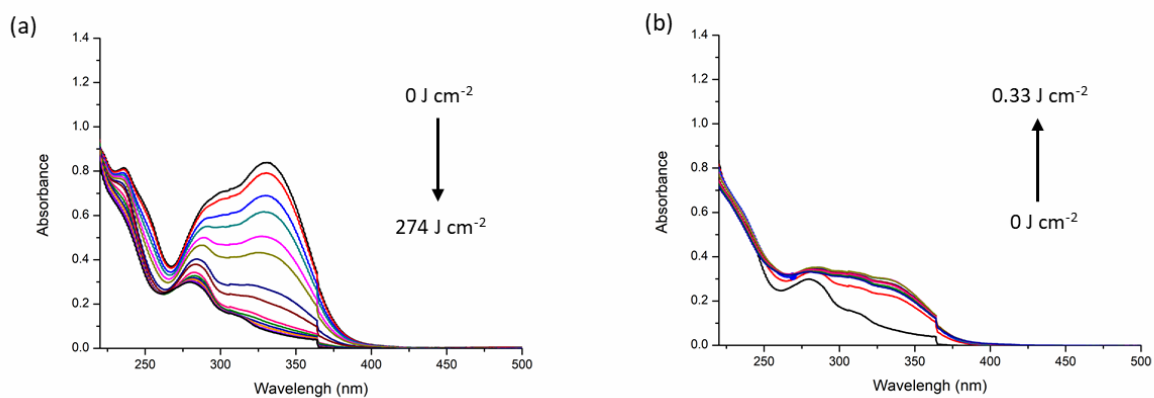

Figure S15. UV-Vis spectra for PA-6. (a) Crosslinking at 365 nm (90%). (b) Decrosslinking at 254 nm (36%).

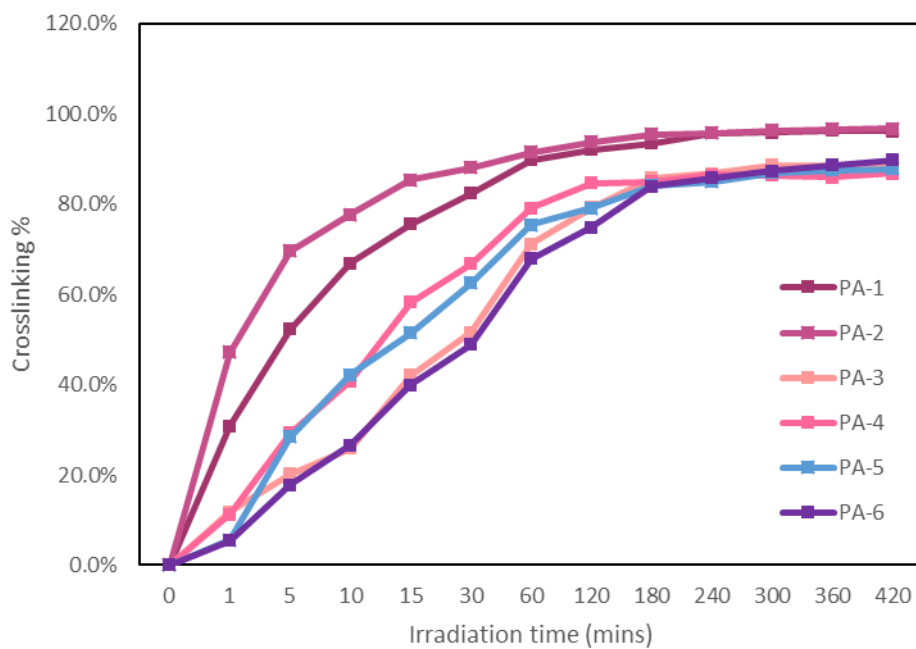

Figure S16. Crosslinking % calculated using UV-Vis spectra for PA-1 to PA-6 with respect to 365 nm irradiation time.



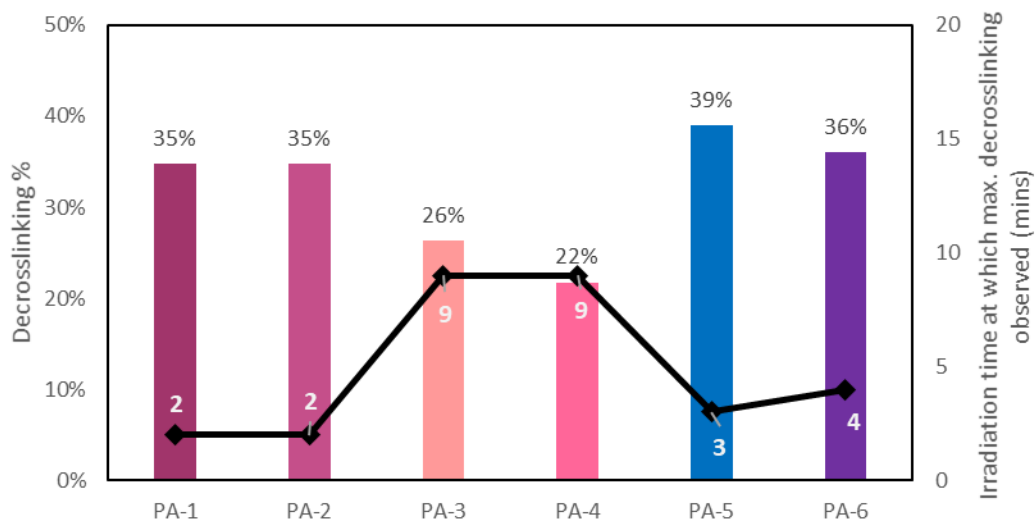

**Figure S17.** Comparison of decrosslinking % calculated using UV-Vis spectra and the 254 nm irradiation time at which maximum decrosslinking observed for PA-1 to PA-6.

#### 4. Thermogravimetric analysis (TGA) data of polymer adhesive PA-1 to PA-6

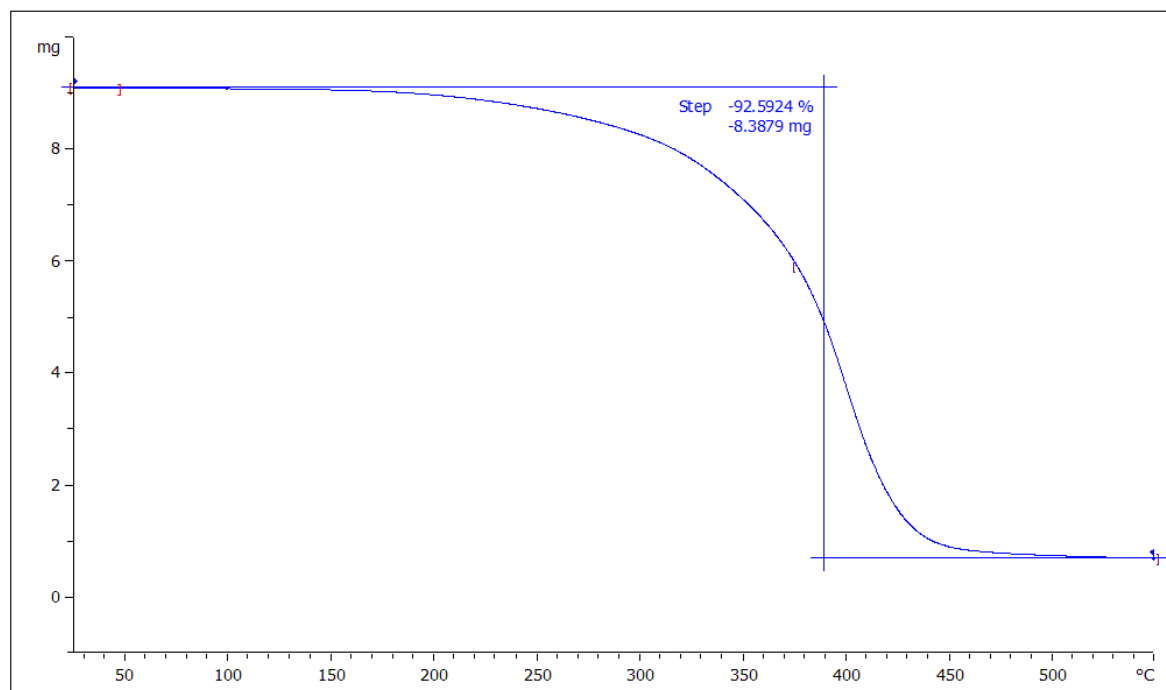

Lab: METTLER

STAR<sup>e</sup> SW 10.00

**Figure S18.** Thermogravimetric analysis data for polymer adhesive PA-1.

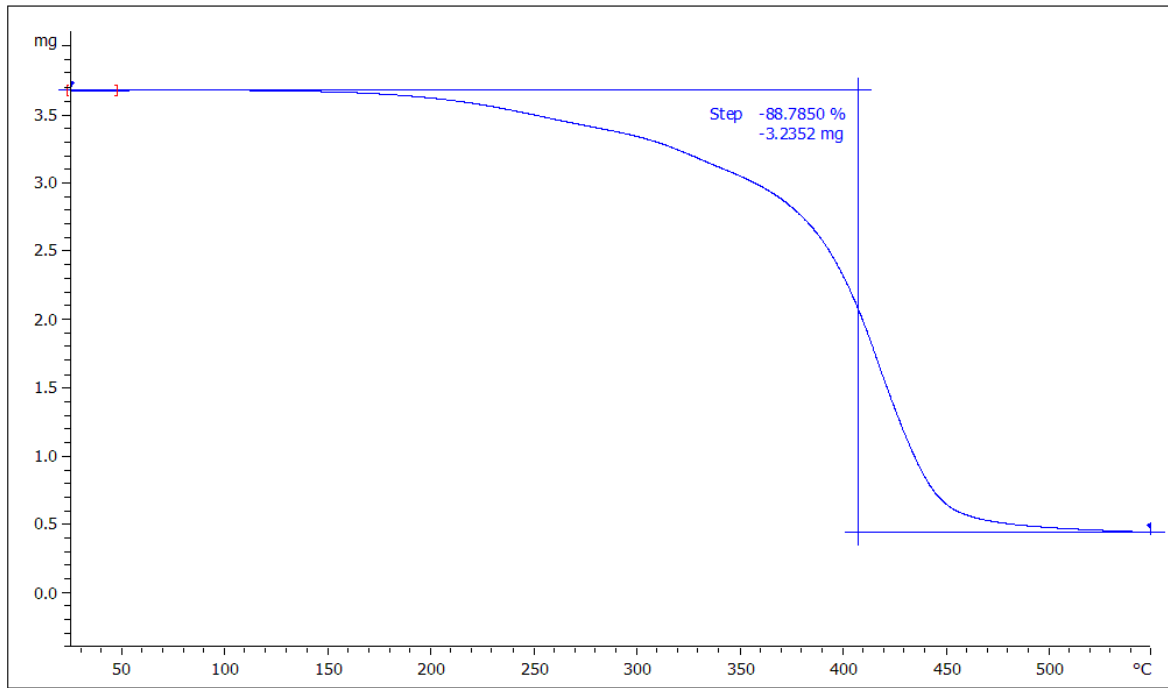

Lab: METTLER

STAR<sup>e</sup> SW 10.00

Figure S19. Thermogravimetric analysis data for polymer adhesive PA-2.

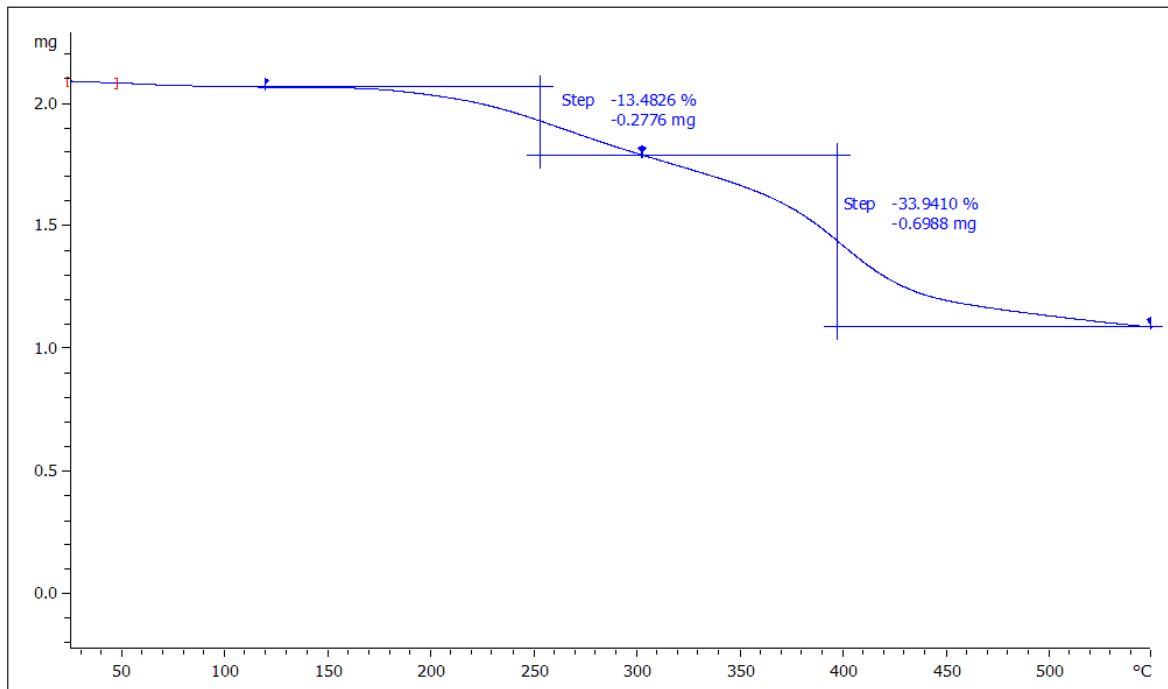

Lab: METTLER

STAR<sup>e</sup> SW 10.00

Figure S20. Thermogravimetric analysis data for polymer adhesive PA-3.

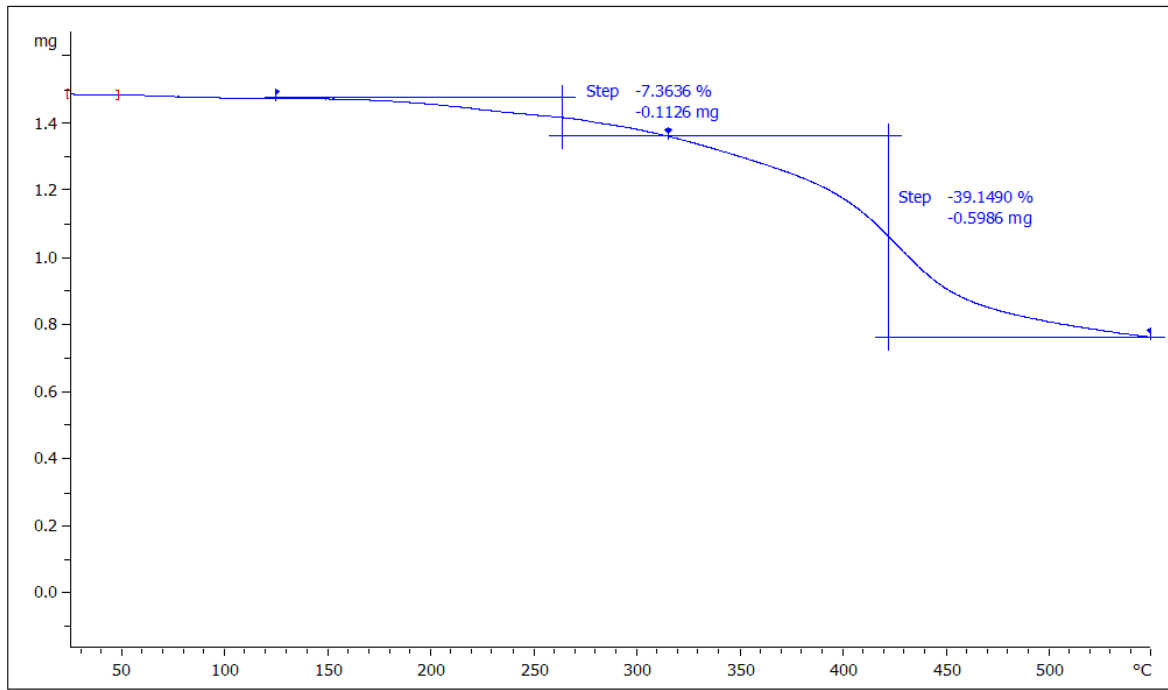

Lab: METTLER

STAR<sup>e</sup> SW 10.00

Figure S21. Thermogravimetric analysis data for polymer adhesive PA-4.

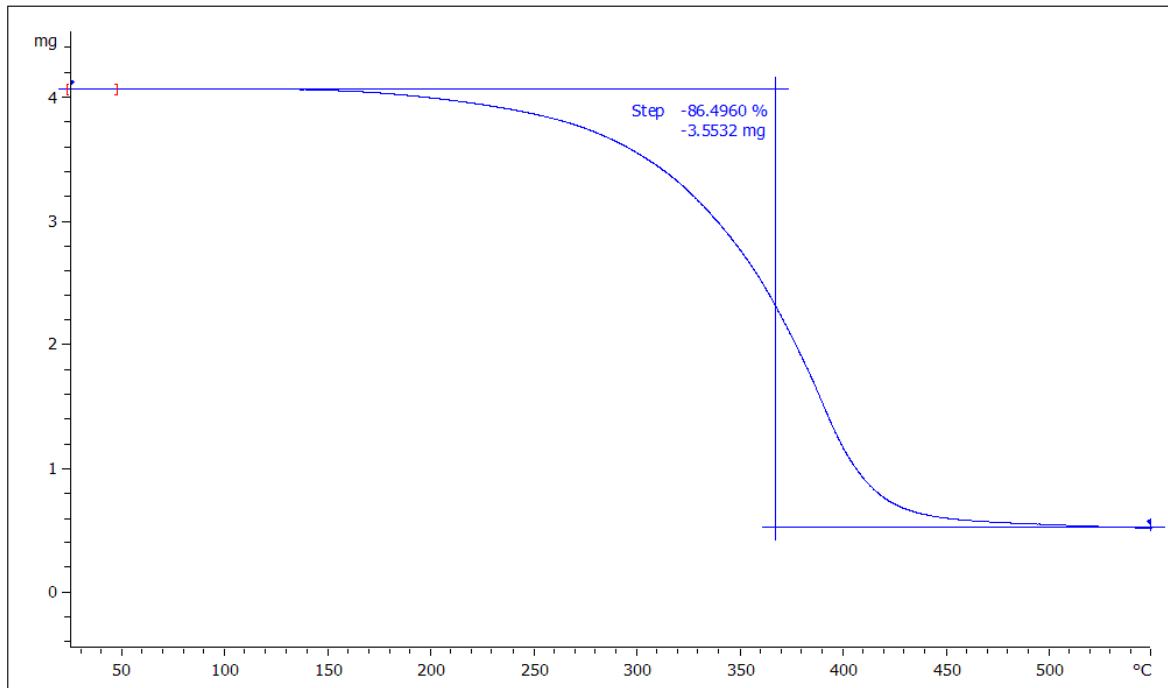

Lab: METTLER

STAR<sup>e</sup> SW 10.00

Figure S22. Thermogravimetric analysis data for polymer adhesive PA-5.

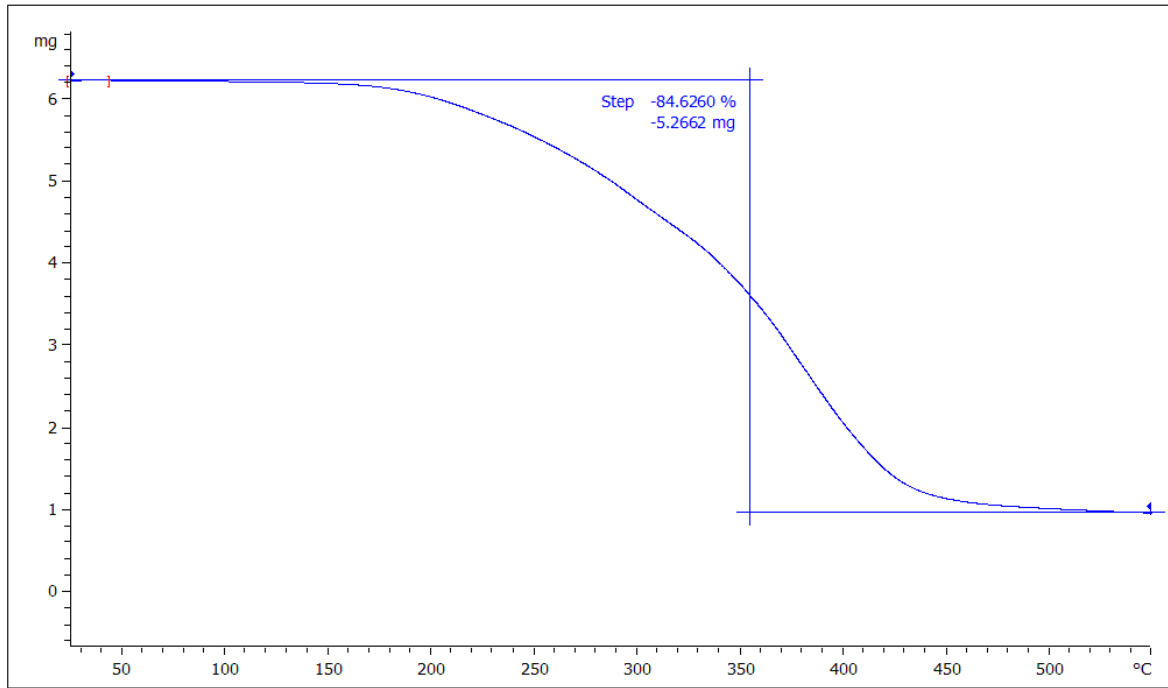

Lab: METTLER

STAR<sup>e</sup> SW 10.00

Figure S23. Thermogravimetric analysis data for polymer adhesive PA-6.

5. Glass transition temperature of polymer adhesive PA-1 to PA-6

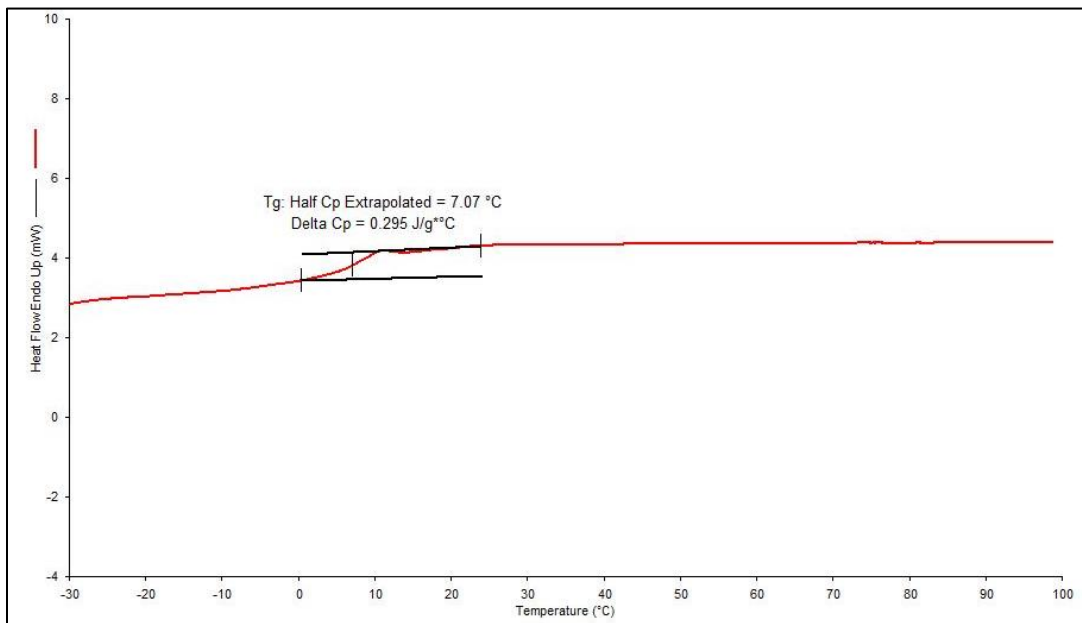

Figure S24. Glass transition temperature for polymer adhesive PA-1 at crosslinked state.

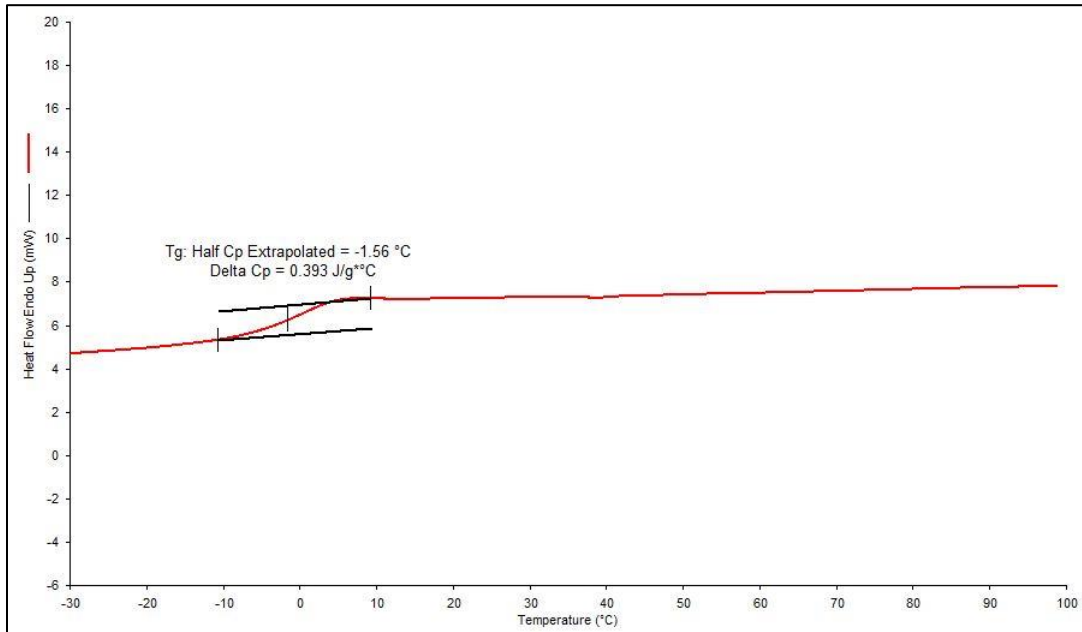

Figure S25. Glass transition temperature for polymer adhesive PA-1 at decrosslinked state.

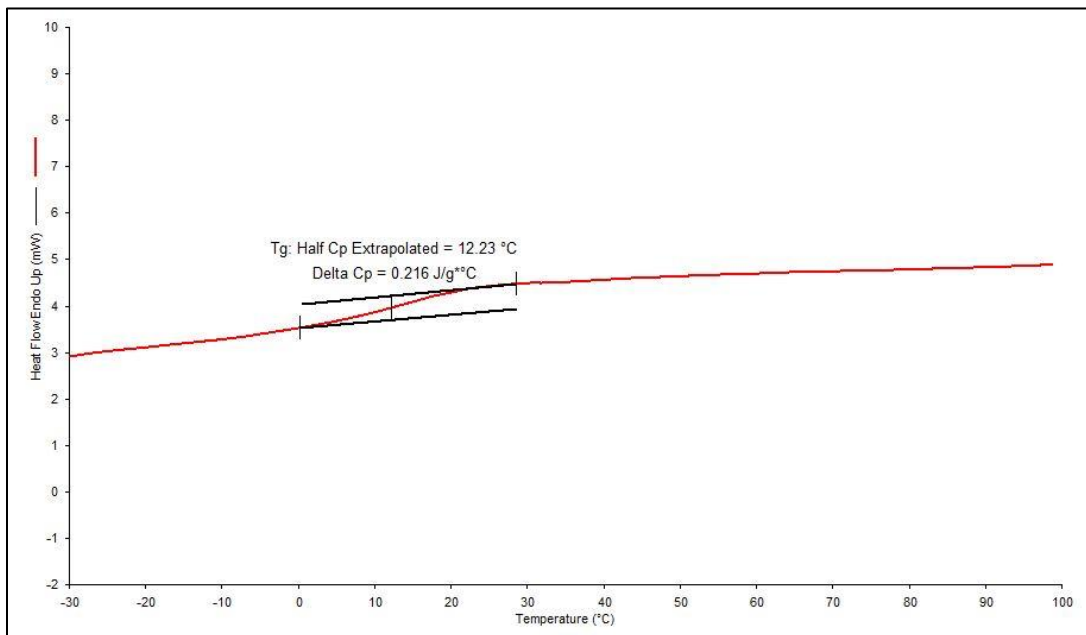

Figure S26. Glass transition temperature for polymer adhesive PA-2 at crosslinked state.

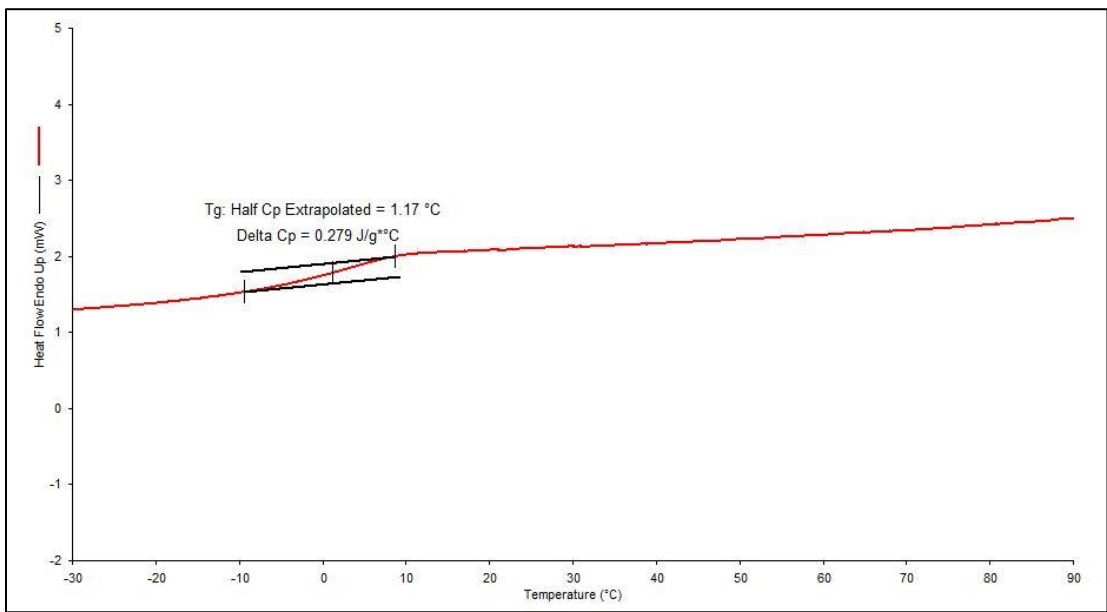

Figure S27. Glass transition temperature for polymer adhesive PA-2 at decrosslinked state.

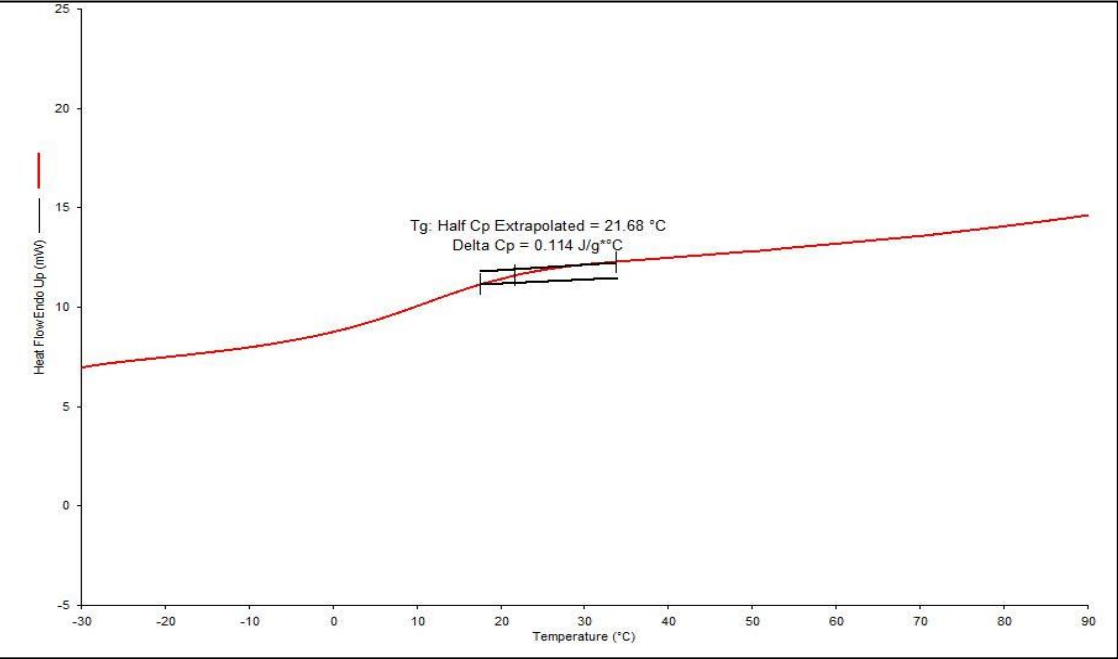

Figure S28. Glass transition temperature for polymer adhesive PA-3 at crosslinked state.

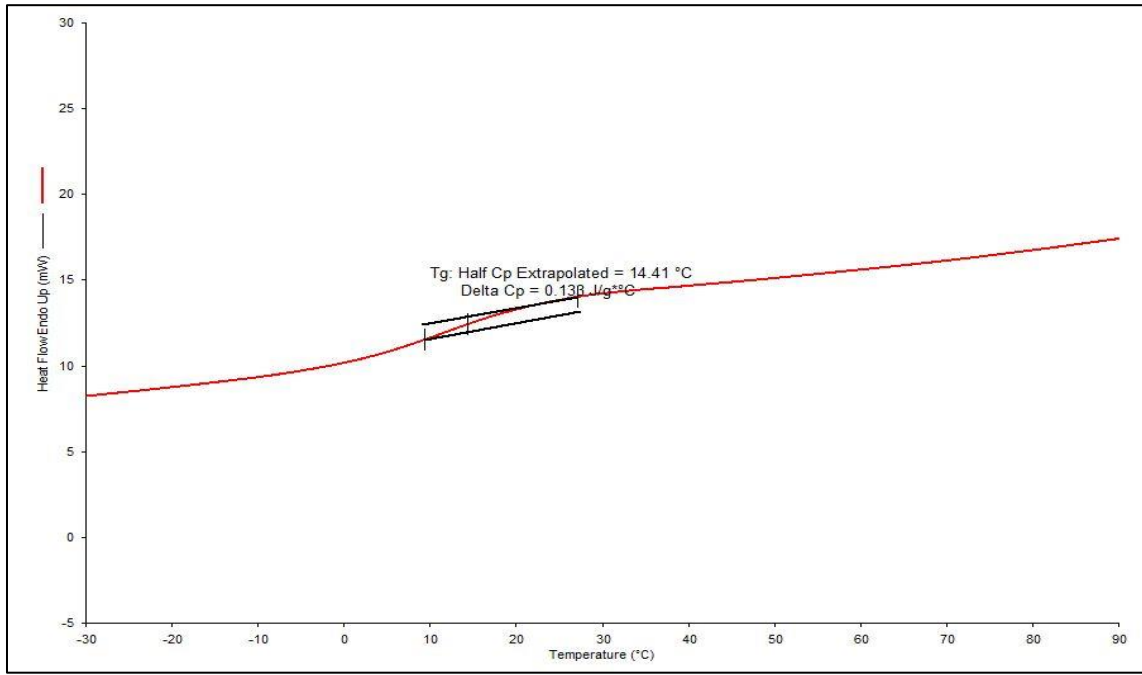

Figure S29. Glass transition temperature for polymer adhesive PA-3 at decrosslinked state.

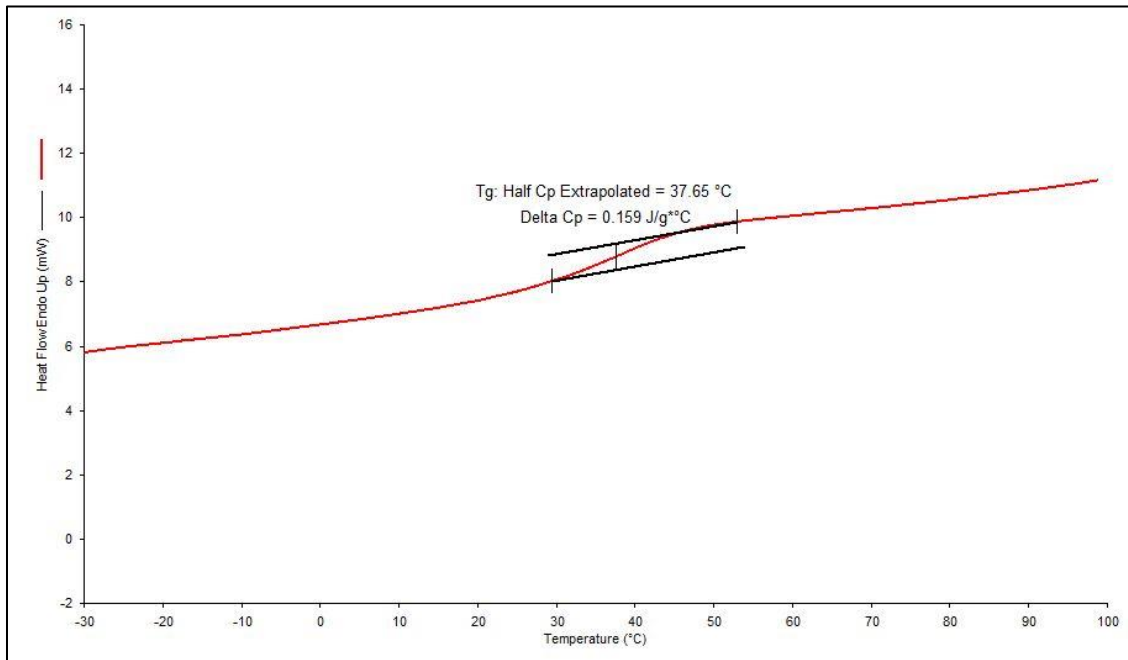

Figure S30. Glass transition temperature for polymer adhesive PA-4 at crosslinked state.

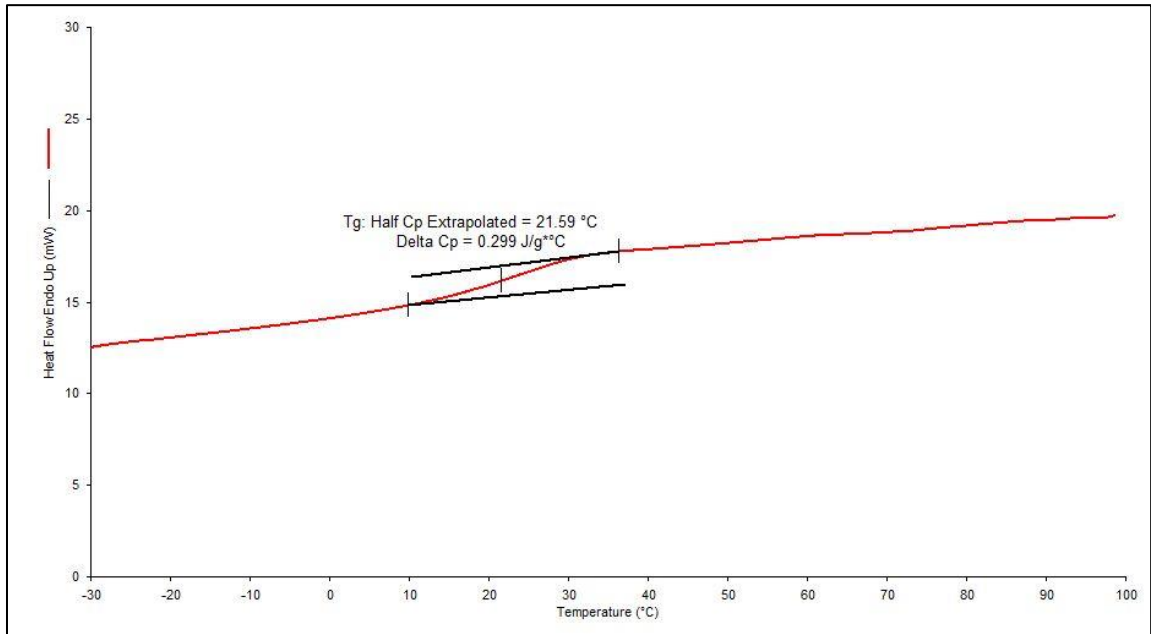

Figure S31. Glass transition temperature for polymer adhesive PA-4 at decrosslinked state.

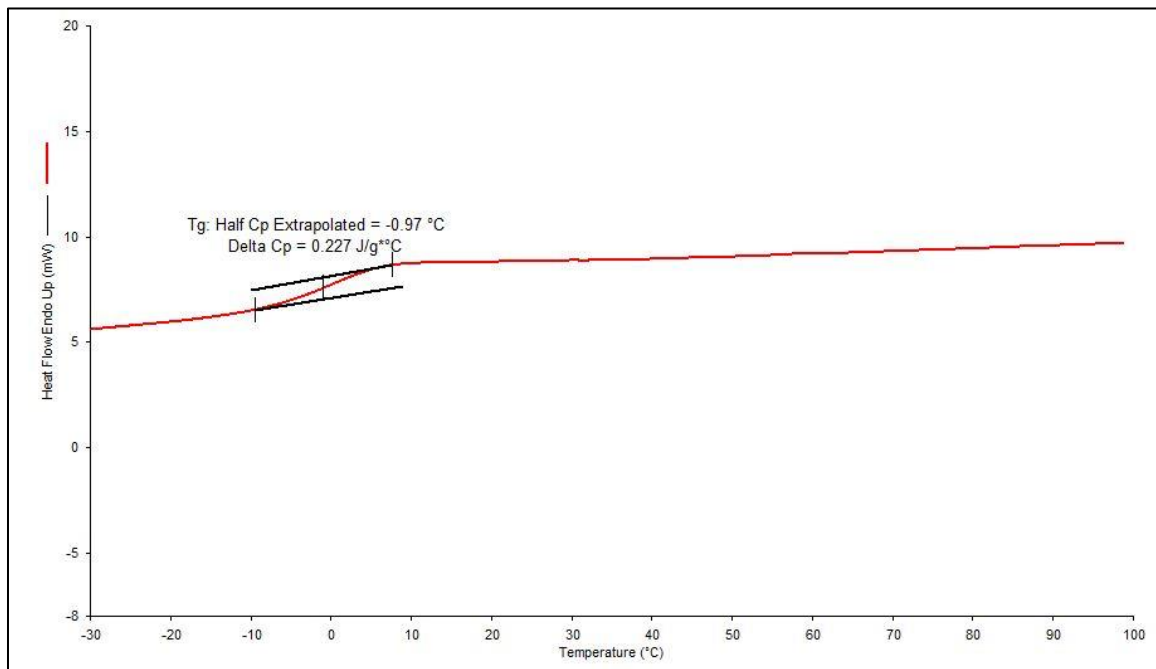

Figure S32. Glass transition temperature for polymer adhesive PA-5 at crosslinked state.



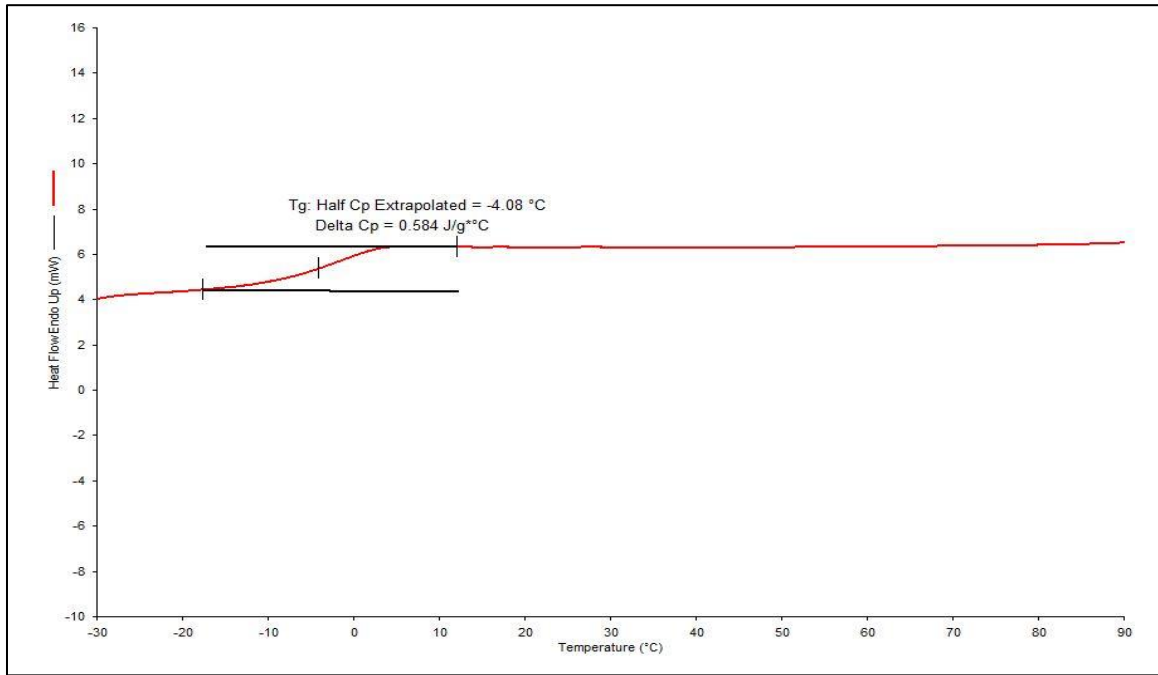

**Figure S33.** Glass transition temperature for polymer adhesive PA-5 at decrosslinked state.

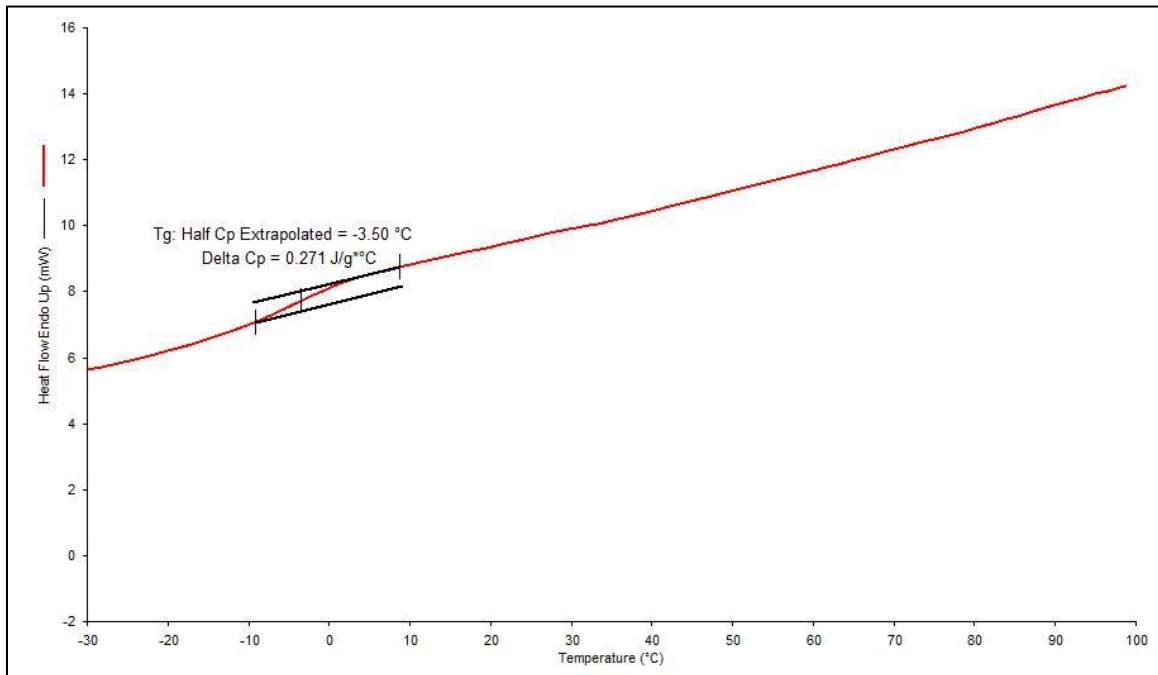

**Figure S34.** Glass transition temperature for polymer adhesive PA-6 at crosslinked state.

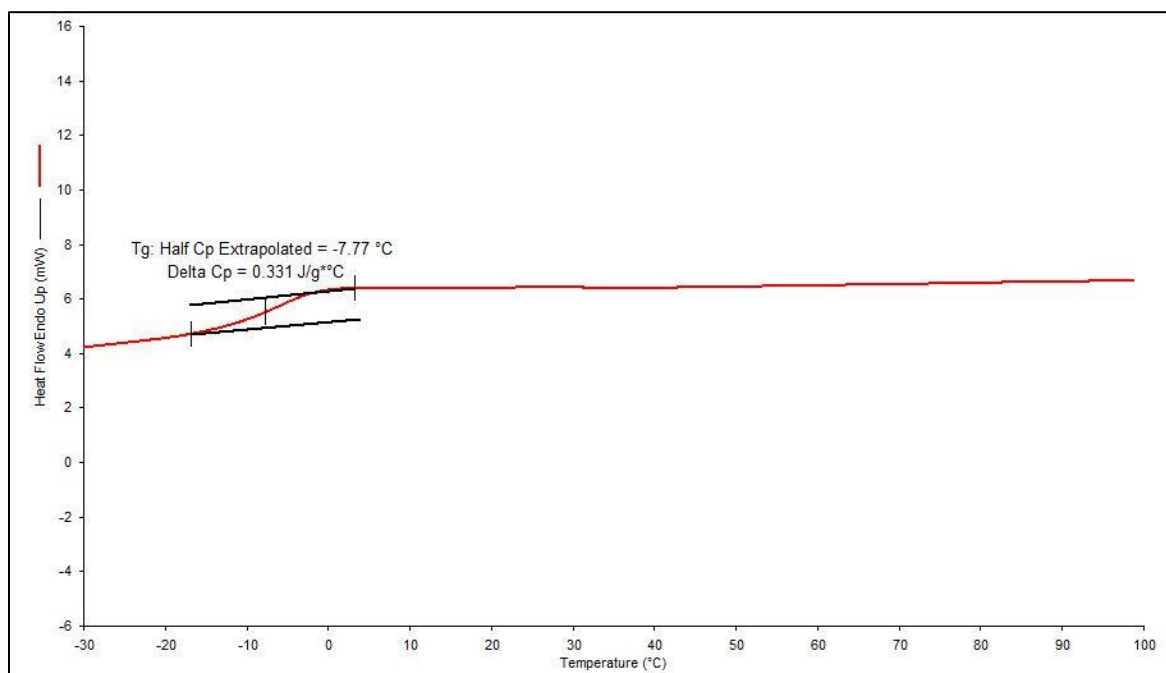

Figure S35. Glass transition temperature for polymer adhesive PA-6 at decrosslinked state.

## 6. Additional adhesive lap shear strength testing results for polymer adhesive PA-1

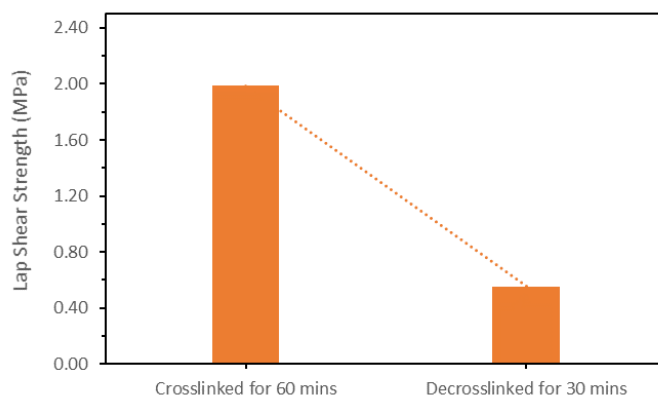

Figure S36. Reversibility test for the lap shear strength at 1.5 M concentration irradiated with 365 nm and 254 nm respectively.

## 7. Design of experiment

Table S1. Design of Experiments for the adhesive strength

| Exp. No. | Exp. Name | Run Order | Incl/Excl | Molar Concentration (mol/L) | Irradiation Time (min) | Lap Shear Strength (MPa) |
|----------|-----------|-----------|-----------|-----------------------------|------------------------|--------------------------|
| 1        | N1        | 1         | Incl      | 0.125                       | 5                      | 0                        |
| 2        | N2        | 6         | Incl      | 1                           | 5                      | 0.1                      |
| 3        | N3        | 7         | Incl      | 0.125                       | 120                    | 0                        |
| 4        | N4        | 14        | Incl      | 1                           | 120                    | 1.57                     |

|    |     |    |      |          |         |                |
|----|-----|----|------|----------|---------|----------------|
| 5  | N5  | 5  | Excl | 0.125    | 43.3333 | 0 <sup>a</sup> |
| 6  | N6  | 4  | Excl | 1        | 43.3333 | 0 <sup>a</sup> |
| 7  | N7  | 11 | Incl | 1        | 81.6667 | 1.55           |
| 8  | N8  | 8  | Incl | 0.416667 | 5       | 0.08           |
| 9  | N9  | 9  | Incl | 0.708333 | 5       | 0.23           |
| 10 | N10 | 10 | Incl | 0.708333 | 120     | 1.11           |
| 11 | N11 | 2  | Incl | 0.5625   | 62.5    | 0.87           |
| 12 | N12 | 12 | Incl | 0.5625   | 62.5    | 0.9            |
| 13 | N13 | 13 | Incl | 0.5625   | 62.5    | 0.92           |
| 14 | N14 | 3  | Incl | 0.5625   | 62.5    | 0.99           |

<sup>a</sup> abnormal value excluded of the DoE

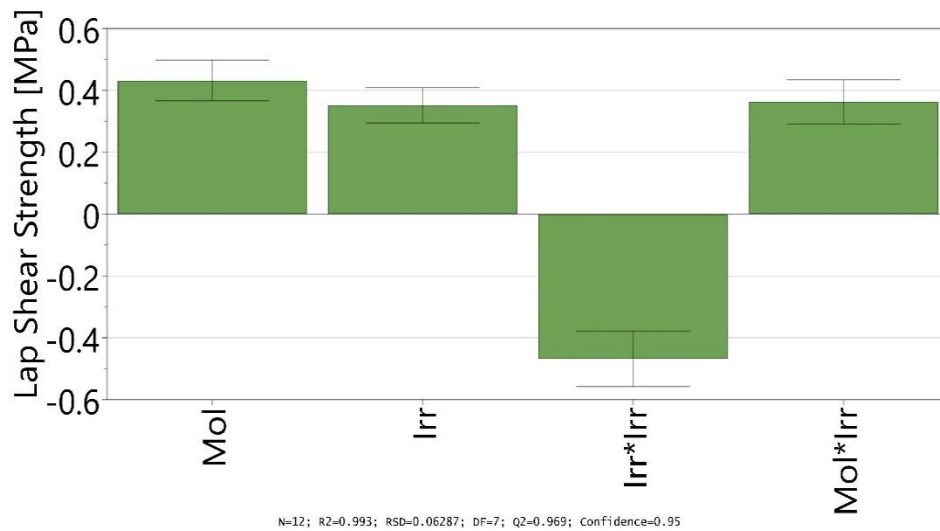

**Figure S37.** D-optimal coefficients of the quadratic model for the Lap Shear Strength.

**Table S2.** Analysis of variance (ANOVA) for the model.

| Lap Shear Strength | Degrees of Freedom (DF) | Sum of Squares (SS) | Mean Squares |         | p-Value        | Standard Deviation (SD) |
|--------------------|-------------------------|---------------------|--------------|---------|----------------|-------------------------|
|                    |                         |                     | (MS)         | F-Value |                |                         |
|                    |                         |                     | Variance     |         |                |                         |
| Total              | 12                      | 9.5622              | 0.79685      |         |                |                         |
| Constant           | 1                       | 5.76853             | 5.76853      |         |                |                         |
| Total corrected    | 11                      | 3.79367             | 0.344879     |         |                | 0.587264                |
| Regression         | 4                       | 3.766               | 0.9415       | 238.2   | 0 <sup>a</sup> | 0.970309                |
| Residual           | 7                       | 0.0276679           | 0.00395255   |         |                | 0.0628693               |

|                                 |        |                                    |            |                                              |                          |           |
|---------------------------------|--------|------------------------------------|------------|----------------------------------------------|--------------------------|-----------|
| Lack of Fit<br>(Model error)    | 4      | 0.0198679                          | 0.00496697 | 1.91037                                      | <b>0.311<sup>b</sup></b> | 0.0704767 |
| Pure error<br>(Replicate error) | 3      | 0.0078                             | 0.0026     |                                              |                          | 0.0509902 |
|                                 | N = 12 | Q <sup>2</sup> =                   | 0.969      | Cond. no. =                                  | 3.02                     |           |
|                                 | DF = 7 | R <sup>2</sup> =                   | 0.993      | Relative<br>Standard<br>Deviation<br>(RSD) = | 0.06287                  |           |
|                                 |        | R <sup>2</sup> adj. <sup>c</sup> = | 0.989      |                                              |                          |           |

<sup>a</sup> Significance of the model at 95% confidence level

<sup>b</sup>  $p > 0.05$  no lack of fit

<sup>c</sup> R<sup>2</sup> adjusted for degree of freedom

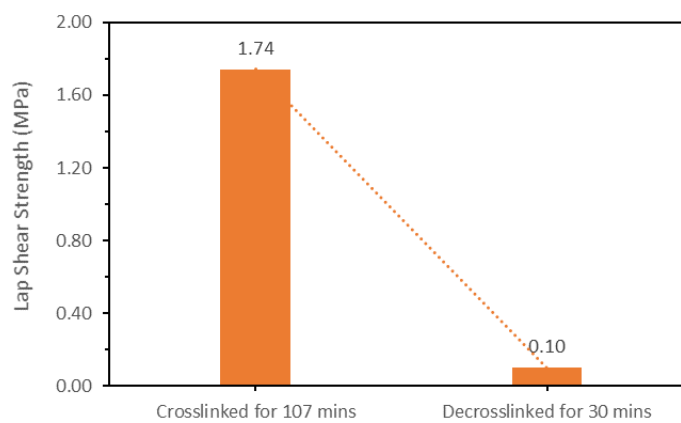

**Figure S38.** Reversibility test for the lap shear strength value at 1 M concentration irradiated with 365 nm and 254 nm respectively.

8. Optical microscope images for failure mode analysis

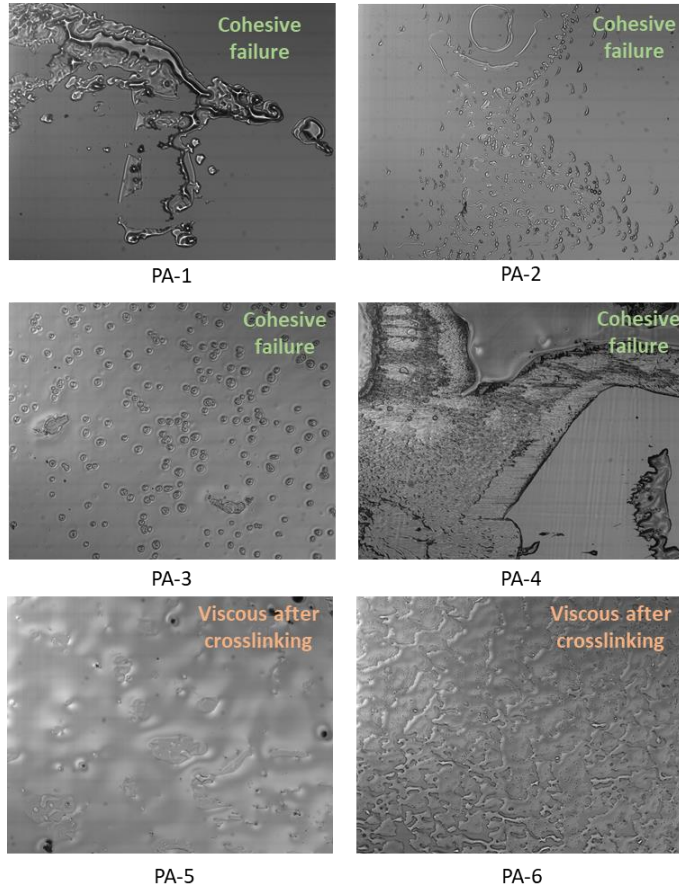

Figure S39. Failure analysis for all the polymer adhesive structures PA-1 to PA-6.
